# Supplementary material for: Targeting transgenic proteins to alpha granules for platelet-directed gene therapy
Source: PubMed Central journal article supplement — Mol Ther Nucleic Acids. 2022 Jan 3;27:774–86. doi: 10.1016/j.omtn.2021.12.038 (PMC8783114; doi:10.1016/j.omtn.2021.12.038), 2022-01-03
Supplement: mmc2.pdf [file mmc2.pdf]

# Targeting transgenic proteins to alpha granules for platelet-directed gene therapy

Vanessa M.A. Woods,<sup>1,3</sup> Lisette J. Latorre-Rey,<sup>2,3</sup> Franziska Schenk,<sup>2</sup> Marcel G.E. Rommel,<sup>2</sup> Thomas Moritz,<sup>1</sup> and Ute Modlich<sup>2</sup>

<sup>1</sup>RG Reprogramming and Gene Therapy, Institute of Experimental Hematology, Hannover Medical School, 30625 Hannover, Germany; <sup>2</sup>RG Gene Modification in Stem Cells, Division of Veterinary Medicine, Paul-Ehrlich-Institute, 63225 Langen, Germany

**Platelets are anucleate blood cells that are shed from megakaryocytes (MKs) into the bloodstream to maintain hemostasis and promote wound healing after vascular injury. To carry out their functions, platelets become activated and release bioactive substances from their secretory granules. As alpha granules ( $\alpha$ Gs) in resting platelets store proteins and release them only after activation, the packaging of proteins into  $\alpha$ Gs is an attractive strategy to deliver therapeutic proteins. Here, we propose an adjustable model for targeting transgenic proteins to platelet  $\alpha$ Gs using third-generation self-inactivating lentiviral vectors. The vectors express from the murine platelet factor 4 promoter (mPf4P), restricting transgene expression to the MK lineage. For the delivery and retention of expressed proteins in  $\alpha$ Gs, proteins are fused to short peptide sorting signals derived from the human cytokine RANTES or from the transmembrane protein P-selectin. We demonstrate effective targeting of GFP to  $\alpha$ Gs of murine and human *in vitro*-differentiated MKs and murine platelets *in vivo*. Furthermore, interferon- $\alpha$  (IFN $\alpha$ ), as a potentially therapeutic cytokine, was successfully delivered to and stored in murine platelets *in vivo*, was released after activation, and inhibited virus replication *in vitro*. Our vectors create possibilities for numerous applications in cell therapy utilizing platelets as carriers of therapeutic proteins.**

## INTRODUCTION

Platelets are small anucleate blood cells that are released from megakaryocytes (MKs) in the bone marrow (BM). They circulate in a resting state in the blood, carrying numerous bioactive substances in their granules, which they release after activation. Platelet activation is triggered by the environment, such as by vessel injuries or pathogens, and mediated via specific platelet surface receptors, including the glycoprotein (GP) IIb/IIIa and GPIb/IX/V complexes or the thrombin protease-activated receptor (PAR). This unique physiology makes platelets attractive cell therapy targets. Researchers have studied the use of platelets and of platelet membrane-coated nanoparticles as drug delivery tools (e.g., to target tumors or cardiovascular disease).<sup>1–4</sup> Platelet-directed gene therapy has been explored for the delivery of coagulation factors to treat hemophilia.<sup>5</sup> In this case, gene transfer is done in the patient's autologous hematopoietic stem and progenitor cells (HSPCs), which are then transplanted back

into the patient in order to replace the blood system with gene-modified cells. With this strategy, a long-lasting therapeutic effect is guaranteed. To restrict transgene expression to platelets, lentiviral vectors with MK-specific promoters are generally used. In this context, a clinical trial in patients with preexisting inhibitors has been opened (NCT03818763). Our focus in this study was to load transgenes into platelet alpha granules ( $\alpha$ Gs) so that they will be secreted or presented after activation but will be hidden from circulation until needed, thereby reducing immunogenicity or toxicity. This strategy will allow the delivery of transgenic bioactive substances with high local doses that may not be well tolerated after systemic administration.

$\alpha$ Gs are the most abundant of the three types of platelet granules. They store more than 300 different proteins, such as growth factors (e.g., vascular endothelial growth factor [VEGF]), cytokines (e.g., platelet factor 4, tumor necrosis factor alpha [TNF- $\alpha$ ]), proangiogenic and antiangiogenic factors (e.g., platelet-derived growth factor, thrombospondin), and von Willebrand factor (vWF). The majority of  $\alpha$ G proteins are produced and packaged in MKs, but cargo can also be acquired via selective endocytosis from the plasma.<sup>6</sup> Also,  $\alpha$ Gs have specific proteins on their membranes, including GPIIb/IIIa (CD41) and P-selectin (CD62P). Whereas CD41 is also expressed on the surface of resting platelets, P-selectin is specifically translocated to the platelet surface after activation. P-selectin is incorporated into the granule membrane at the *trans*-Golgi network,<sup>7</sup> with the signals responsible for sorting located in the transmembrane domain and cytoplasmic tail.<sup>8,9</sup> However, the intracellular part was shown to be necessary only for sorting to the endothelial cell-specific granules (Weibel-Palade bodies), not  $\alpha$ Gs in platelets.<sup>9</sup>

Received 14 July 2021; accepted 30 December 2021;

<https://doi.org/10.1016/j.omtn.2021.12.038>.

<sup>3</sup>These authors contributed equally

**Correspondence:** Ute Modlich, Research Group for Gene Modification in Stem Cells, Division of Veterinary Medicine, Paul-Ehrlich-Institute, 63225 Langen, Germany.

**E-mail:** [ute.modlich@pei.de](mailto:ute.modlich@pei.de)

**Correspondence:** Thomas Moritz, Research Group Reprogramming and Gene Therapy, Institute of Experimental Hematology, Hannover Medical School, 30625 Hannover, Germany.

**E-mail:** [moritz.thomas@mh-hannover.de](mailto:moritz.thomas@mh-hannover.de)

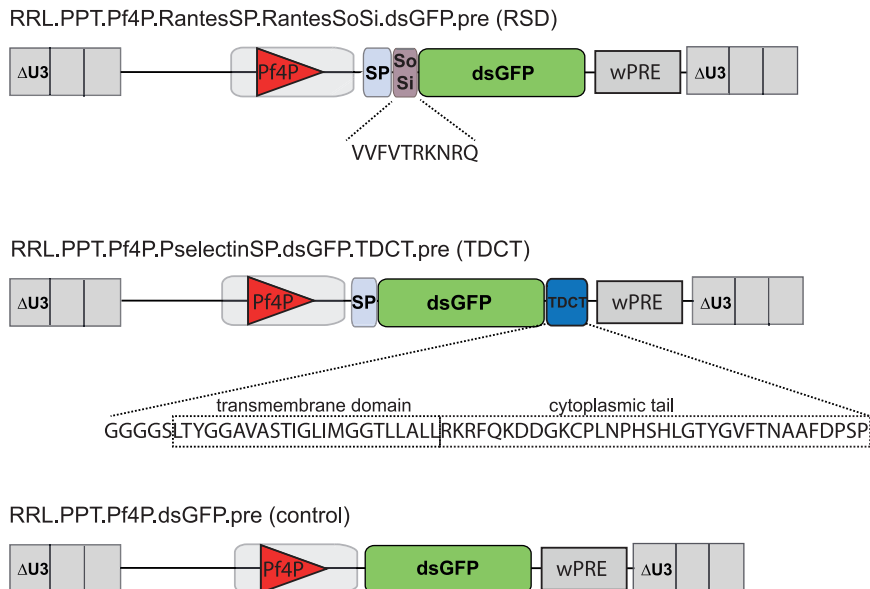

**Figure 1. Lentiviral vector designs for alpha granular targeting**

Third-generation self-inactivating (SIN) lentiviral vectors driving the expression of dsGFP from the internal Pf4 promoter. Protein-sorting sequences of RANTES and its signal peptide were fused 5' of dsGFP (RSD vector). P-selectin's TDCT was fused 3' of dsGFP, while its signal peptide was inserted 5' of dsGFP (TDCT vector). ΔU3, 3' unique region with deletion; SP, signal peptide; SoSi, sorting signal; dsGFP, destabilized green fluorescent protein; wPRE, woodchuck hepatitis virus post-transcriptional regulatory element; Pf4P, platelet factor 4 promoter; TDCT, transmembrane domain, cytoplasmic tail.

platelets. If the protein is fused to the RANTES sorting domain, its release into the blood after activation is expected; when fused to the P-selectin intracellular part and transmembrane domain, it will be presented on the surface of activated platelets. Our platform has great potential for gene and cell therapy,

allowing for the adjustment of the platelet protein cargo as a viable therapeutic tool.

## RESULTS

### Lentiviral vectors for alpha granular targeting

To deliver therapeutic proteins to the αGs in MKs, we designed lentiviral vectors for expression in MKs coding for transgenic proteins with specific αG-sorting signals. We chose two strategies. In the first, we used the sorting signal of 10 aa described in the human chemokine RANTES.<sup>10</sup> This sequence was fused downstream of the signal peptide of RANTES to the N terminus of destabilized (ds)GFP (RANTES sorting domain [RSD] vector, Figure 1). In our second strategy, dsGFP was fused at its C terminus to the transmembrane and cytoplasmic tail (TDCT) of human P-selectin. For transport to the endoplasmic reticulum, the signal peptide of P-selectin was fused to the N terminus of dsGFP (TDCT vector, Figure 1). All lentiviral vectors were expressed from the murine platelet factor 4 promoter (Pf4P), which has strong activity in MKs.<sup>18</sup> As the control, a lentiviral vector expressing dsGFP without any modification was used.

### Expression from lentiviral vectors with alpha granular targeting domains

The RSD, TDCT, and control vectors were produced with similar high titers ( $1 \times 10^8$  to  $1 \times 10^9$  infectious particles/mL after concentration) (Figure 2A). Vector performance was evaluated by transducing the megakaryoblastic leukemia cell line MEG-01 with the RSD and TDCT targeting vectors, as well as the control vector at defined multiplicities of infection (MOIs). We observed similar transduction efficiencies of 23.3%, 25.4%, and 22.6% for the RSD, TDCT, and control vectors, respectively, with the MOI of 0.25 (Figure 2B). To further characterize the vectors, MEG-01 cells were

Soluble proteins are sorted into αGs by various mechanisms. A four amino acid (aa) sequence has been identified in the platelet factor 4 (Pf4) cytokine, and subsequently also in the cytokines Nap2 and RANTES, as responsible for αG sorting.<sup>10,11</sup> In contrast, large proteins, such as vWF or multimerin, probably localize to granules by a mechanism of self-assembly.<sup>12,13</sup> Other proteins, such as fibrinogen, are endocytosed at the plasma membrane of MKs or platelets by the αIIbβ3 integrin receptor.<sup>14</sup> The respective sorting signals are thought to be recognized by cytosolic proteins that act as adapters for the recruitment of clathrin, although the precise molecular underpinnings of granular sorting are poorly understood.

As protein sorting primarily takes place in MKs, we postulated that the expression of transgenic proteins equipped with suitable sorting signals in MKs may allow their specific loading into the αGs. The granules will then be transferred to platelets with the therapeutic cargo. A strategy for loading proteins to αGs has been explored by fusing FVIII to the D2 domain of the vWF propeptide.<sup>15</sup> This domain was shown to be responsible for the sorting and retention of vWF in αGs.<sup>16,17</sup> Effective sorting of D2.FVIII to platelet αGs was demonstrated, but release was not improved. In addition, the D2 domain spans >400 aa, and with this, it may not be suitable to target small proteins, while also taking up considerable coding capacity in gene transfer vectors.

We have previously shown that by using the promoter of Pf4, we could target gene expression into the MK lineage after lentiviral gene transfer to hematopoietic stem cells.<sup>18</sup> In building on these vectors, we have generated lentiviral vectors utilizing the sorting signals of P-selectin and RANTES for targeting proteins to αGs in MKs and

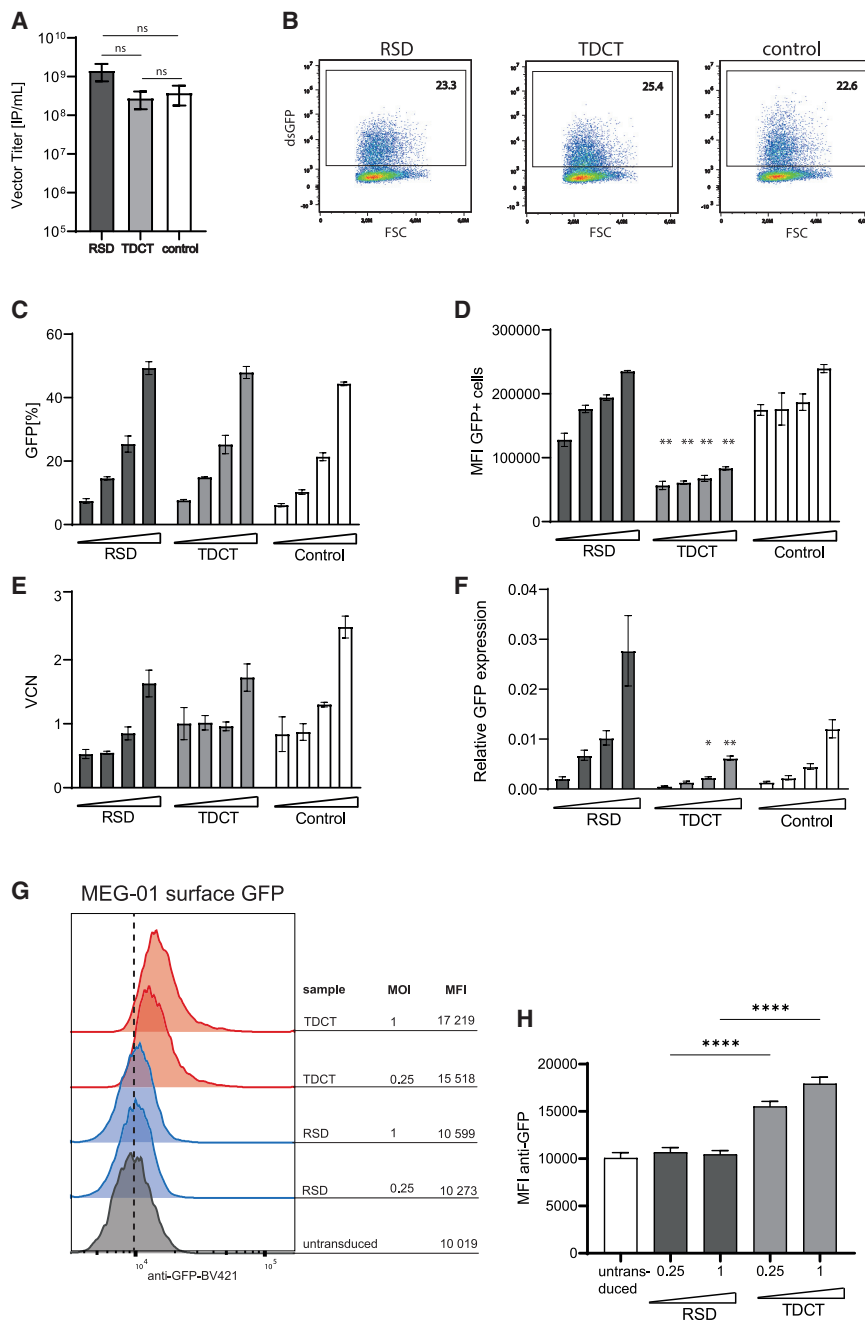

**Figure 2. Vector characterization in MEG-01 cells**

(A) Vector titers of all three vectors. (B) Representative flow cytometry plots. (C) Transduction efficiency. (D) MFI of GFP<sup>+</sup> cells normalized to mock MFI. (E) VCN and (F) GFP mRNA expression in cells transduced with MOIs 0.075, 0.13, 0.25, and 0.6 of the RSD, TDCT, or control vector. Data represent mean ± SD, n = 3–5 independent cultures; in (A) one-way ANOVA, ns, no significant difference; (C–F) two-way ANOVA, value from one vector at one MOI was compared with the other two vectors at the same MOIs; significance is relative to RSD and control; \*p < 0.05, \*\*p < 0.01. (G) Flow cytometric histograms showing surface GFP expression in MEG-01 cells transduced with TDCT (MOI 0.25 and 1) in comparison with RSD and untransduced cells. GFP was detected by antibody staining (clone 1A12-6-18, BD Bioscience). (H) Summarized quantification of the MFI of cell surface GFP on MEG-01 cells. n = 3 independent transductions, mean ± SD, one-way ANOVA, \*\*\*\*p < 0.0001. MOI, multiplicity of infection; MFI, mean fluorescence intensity; VCN, vector copy number.

increased with higher vector doses, but there was no linear correlation, probably due to the overall low values (Figure 2E). When we investigated transcription from the integrated vectors by quantifying GFP mRNA, we observed a similar dose-dependent increase in the relative GFP expression for all three vectors; however, the expression from the TDCT vector was the lowest. This was in agreement with the lower MFI of GFP expression from this vector (Figure 2F). Since the TDCT vector expresses a membrane-anchored protein, we wanted to specifically highlight this capability. Therefore, we transduced MEG-01 cells with increasing vector doses and confirmed the presence of cell-surface GFP by staining live cells with an anti-GFP antibody (Figures 2G and 2H). P-selectin expression in MEG-01 cells was also confirmed by flow cytometry (Figure S1). Taken together, our analysis confirmed good expression from the vectors with reliable transduction efficiencies, similar to our well-studied control vector. Only the TDCT vector showed overall lower GFP intensities, which could be

explained by lower levels of transcription from the vector.

#### Colocalization of proteins in the $\alpha$ Gs of murine and human megakaryocytes

To address the level of  $\alpha$ G targeting, we evaluated the colocalization of the transgenic reporter protein dsGFP encoded by the RSD and TDCT vectors with the  $\alpha$ G marker proteins vWF and P-selectin in murine and human MKs derived from transduced HSPCs. The colocalization analysis was performed on confocal

transduced with increasing MOIs (0.075, 0.13, 0.25, 0.6) and evaluated for transduction efficiency, mean fluorescence intensity (MFI), vector copy number (VCN), and relative GFP mRNA expression (Figures 2C–2F). There was a dose-dependent increase in transduction efficacy ranging from 6% to 52% GFP for all three vectors (Figure 2C). However, the intensity of GFP expression (MFI of GFP<sup>+</sup> cells) from the TDCT vector was only about half of that from the RSD and the control vector (Figure 2D). We then evaluated the efficiency of vector integration in MEG-01 cells. The mean VCN

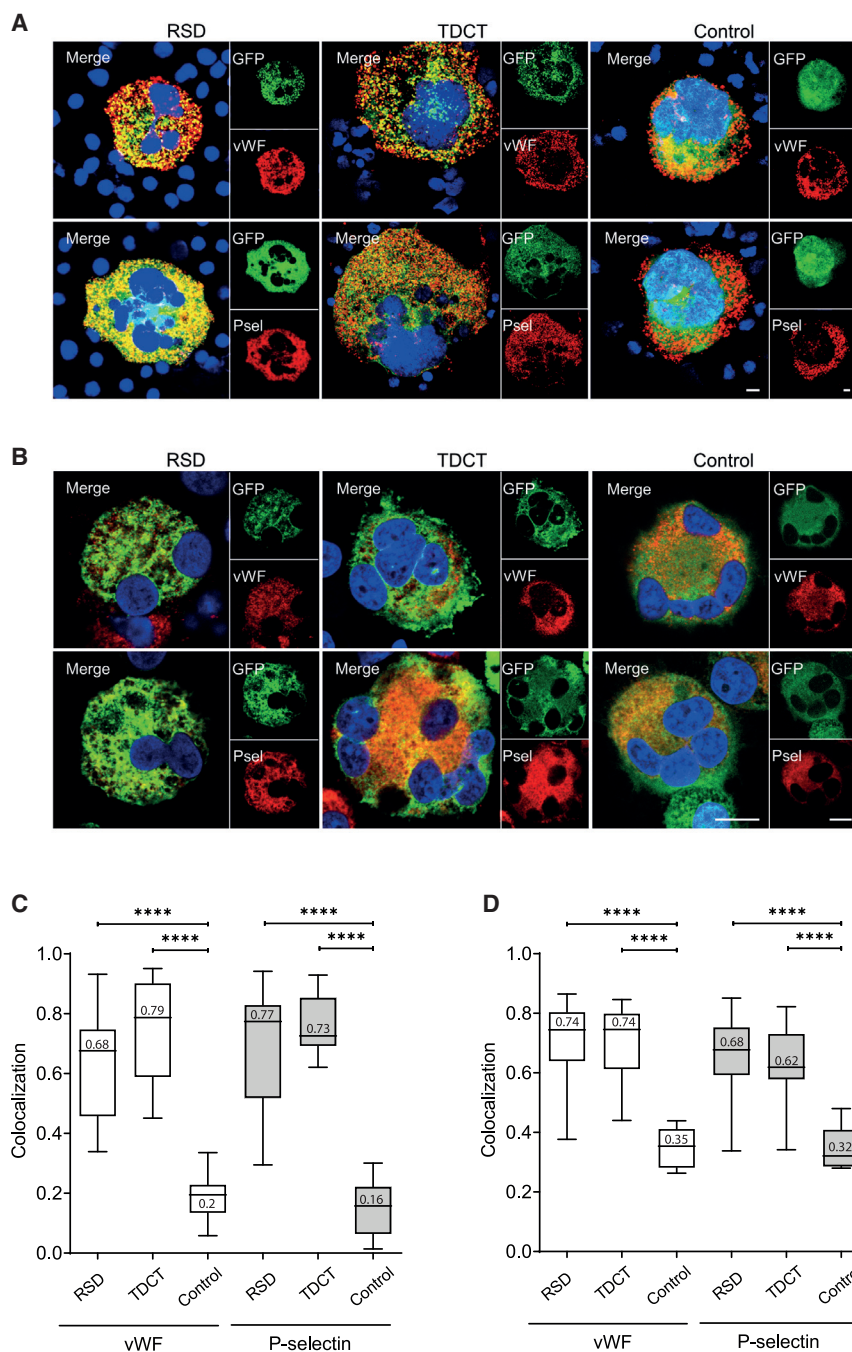

images of MK immunostained with anti-vWF or P-selectin antibodies. Both murine and human MKs demonstrated the characteristic polyploid phenotype of mature MKs (Figures 3A and 3B), which was further confirmed by flow cytometry showing up to 70% CD41<sup>+</sup>/CD42b<sup>+</sup> surface-marker expression in human and up to 40% in murine MKs and >4N ploidy (Figures S2 and S3). The differentiation potential of HSPCs was not affected by vector transduction, as demonstrated in human and mouse MKs by their

### Figure 3. Colocalization analysis of $\alpha$ G targeting in murine and human primary megakaryocytes (MKs)

Immunofluorescence images of MKs differentiated from transduced (A) murine lineage-marker-negative BM cells or (B) human CD34<sup>+</sup> HSPCs. MKs transduced with RSD, TDCT, or control vector (green) were stained with antibodies against  $\alpha$ G proteins (red) and DAPI (blue). vWF<sup>+</sup>  $\alpha$ Gs were visualized with 1<sup>o</sup> rabbit antibodies (Abs) and 2<sup>o</sup> goat-anti-rabbit Alexa Fluor 647 Abs, while P-selectin<sup>+</sup>  $\alpha$ Gs were visualized with 1<sup>o</sup> human/mouse Abs and 2<sup>o</sup> goat-anti-mouse Cy3 Abs. Images were acquired with a Zeiss confocal microscope and a 100 $\times$  oil immersion objective for murine MKs or a Leica confocal microscope with a 63 $\times$  oil immersion objective for human MKs. The merged images show colocalization of vector and  $\alpha$ G protein; scale bar, 10  $\mu$ m. Quantification of colocalization of GFP in the three vectors with vWF or P-selectin in (C) murine MKs (n = 11–28) and (D) human MKs (n = 8–28). MKs were analyzed from two (mouse) and three (human) independent transductions and differentiations. Line at median on box-whisker plots, Mann-Whitney test, \*\*\*\*p < 0.0001.

cell-surface-marker expression and polyploidization (Figures S2 and S3).

The confocal images demonstrated a broad punctate distribution of vWF and P-selectin throughout the cytoplasm of murine and human MKs; however, there was a clear difference in the distribution pattern of the transgenic GFP (Figures 3A and 3B). While cells transduced with RSD or TDCT targeting vectors showed GFP distributed with a dotted appearance in the cytoplasm only, the non-targeting control vector resulted in an even GFP expression in the cytoplasm, as well as high GFP levels in the nucleus (Figures 3A and 3B). No GFP fluorescence was observed in the mock controls (Figure S4). To quantify the colocalization between the GFP encoded by the vectors and the  $\alpha$ G proteins, weighted colocalization coefficients from 0 (no colocalization) to 1 (complete colocalization) were used. This allowed us to record the pixel/intensity signal from the GFP (green) that also had an overlap with the pixel/intensity signal from the  $\alpha$ G proteins (red), as shown in the merged images in Figures 3A and 3B. There was a significantly higher colocalization of transgenic GFP in vWF- and P-selectin-positive  $\alpha$ Gs achieved with the targeting RSD and TDCT vectors compared with the non-targeting control vector in murine and human MKs (Figures 3C and 3D). Thus, approximately 70%, 80%, and 20% GFP colocalization to vWF<sup>+</sup>  $\alpha$ Gs was detected in murine MKs following RSD, TDCT, and control vector transduction, respectively (Figure 3C).

Moreover, colocalization of transgenic GFP to P-selectin<sup>+</sup>  $\alpha$ Gs was very similar. Differences between both targeting vectors and the control vector were highly significant (\*\*\*\* $p < 0.0001$ ), regardless of whether  $\alpha$ G staining was performed with vWF or P-selectin (Figure 3C). Human MKs showed approximately 70% colocalization of transgenic GFP with vWF<sup>+</sup>  $\alpha$ Gs and 68% and 62% with P-selectin after RSD and TDCT transduction, but only 32%–35% for the control vector (Figure 3D). Again, differences between RSD and TDCT compared with the control construct in human MKs were highly significant (\*\*\*\* $p < 0.0001$ ) (Figure 3D). As a further control, we mutated the four core amino acids in the RSD (TRKN) to alanine (AAAA) and demonstrated that this mutation reduced colocalization to vWF-positive granules in MEG-01 cells to 27% (Figure S5). Taken together, these data show highly effective  $\alpha$ G targeting of the transgenic GFP by our RSD and TDCT vectors in murine as well as human MK. Moreover, the use of two different  $\alpha$ G proteins (vWF and P-selectin) in the analysis increased the validity of our results because it is known that the loading of  $\alpha$ G with these proteins is not identical (Figure S6).<sup>19,20</sup>

#### Secretion of proteins from the $\alpha$ Gs of murine platelets

After demonstrating the effective sorting of our  $\alpha$ G-targeted fusion proteins to the  $\alpha$ Gs of murine and human MKs, we next wanted to study whether the cargo would also be transferred to platelets and whether it would be released after platelet activation. This question was addressed in a murine gene transfer/bone marrow transplantation (BMT) model using mTmG marker mice as donors. Platelets of donor mTmG mice are marked by membrane-bound dTomato and can therefore be distinguished from recipient platelets in C57BL/6 hosts (Figure S7). HSPCs from the mTmG marker mice were *in vitro* transduced with the RSD, TDCT, or control vector before transplantation. Successful engraftment in all mice was confirmed by good chimerism in leukocytes and platelets (Figure S8), as well as the recovery of peripheral blood cell counts (Figure S9). The GFP expression in donor platelets was contained over 16 weeks post-transplant (Figure S10). The VCN in TDCT mice was higher than in RSD mice. Accordingly, the control mice were transplanted with BM cells transduced with higher or lower VCN (Figure S11). The high-VCN groups showed lower red blood cell (RBC) counts at 6 weeks posttransplantation, perhaps due to the high transduction rate.

In the supernatants of activated (A) and non-activated (NA) platelets taken from the mice, GFP protein content was measured by ELISA (Figure 4A). Upon activation, RSD platelets released up to 40,000 pg/mL GFP, compared with ~5,000 pg/mL GFP without activation (~8-fold increase). Consistent with the role of P-selectin as a membrane anchor protein, TDCT platelets showed no effective release of GFP into the supernatant in the NA (500 pg/mL) or A (~2,000 pg/mL) state. On the other hand, control platelets released up to 30,000 pg/mL GFP and 25,000 pg/mL GFP in the NA and A states, respectively (Figure 4A), indicating that there was neither effective retention in the NA state nor increased secretion after activation.

Since the secretion of GFP will reduce the amount of GFP in the platelets, we correlated the MFI of GFP expression with platelet activation, assuming that the release of GFP should lower the GFP MFI in platelets (Figure 4B). We observed a clear reduction of GFP levels in RSD platelets after activation, with a ratio of ~0.4 for the MFIs in NA to A platelets (Figures 4C and 4D). This was much less the case for TDCT platelets, and no reduction in GFP levels upon activation was observed in platelets after control vector transduction, indicating that RSD-transduced platelets lost their GFP cargo after activation, while this was not the case for the control vector platelets and was greatly reduced for the TDCT platelets. GFP presentation could be detected on the surface of activated TDCT platelets (Figures 4E and S12). Taken together, our data show that functional platelets that were differentiated from vector-transduced HSPCs carried the GFP cargo. After activation, RSD platelets efficiently released the GFP, while TDCT platelets retained their GFP for presentation on the platelet surface.

#### Targeting IFN $\alpha$ as a therapeutic cytokine to $\alpha$ Gs of human MKs and murine platelets

Since we proved the effective targeting of GFP to the  $\alpha$ Gs of murine and human MK, we next expanded our platform to deliver IFN $\alpha$  as a proof of concept for therapeutic translation. Therefore, we generated two additional lentiviral vectors encoding the human IFN $\alpha$ 1 and coexpressing EGFP by an internal ribosome entry site (IRES). The targeting vector incorporated the human cytokine RANTES signal peptide and sorting signal fused to the N terminus of IFN $\alpha$ 1 (lacking its own signal peptide), so that the IFN $\alpha$  could be secreted from activated platelet  $\alpha$ Gs (RSD.IFN $\alpha$  vector). As the control, a second vector encoded the complete coding sequence of IFN $\alpha$ 1 with its signal peptide and without any additional sorting signals (IFN $\alpha$  vector) (Figure 5A).

We first evaluated  $\alpha$ G targeting efficiency. Therefore, we transduced cord blood (CB)-derived HSPCs with virus supernatants of RSD.IFN $\alpha$  and the IFN $\alpha$  control at MOI 40. We differentiated the cells toward MKs and performed colocalization analysis on immunostained, vector-transduced, and mock cells.  $\alpha$ Gs were visualized by immunostaining against P-selectin (red) and IFN $\alpha$  (Alexa Fluor 647, shown here in green), while GFP was detected without antibody staining (green) (Figure 5B). No IFN $\alpha$  or GFP fluorescent signals were observed in the mock controls (Figure S13). The colocalization analysis showed that there was a significant colocalization of IFN $\alpha$  with P-selectin-positive  $\alpha$ G (\*\* $p < 0.01$ ) in RSD.IFN $\alpha$  MK compared with the control without the RSD domain (Figure 5C). No preferential colocalization of GFP expressed via the IRES to  $\alpha$ Gs was detected, although the colocalization of EGFP was higher than in our previous experiments, probably because EGFP was expressed, in contrast to the destabilized version in the previous vectors. Most important, IFN $\alpha$  expression did not impair MK differentiation or proliferation (Figures S14A–S14E). IFN $\alpha$  expression also was confirmed by mRNA detection (Figure S14F). Taken together, these data showed that we could target IFN $\alpha$  to MK  $\alpha$ G using the RSD vector, and none of

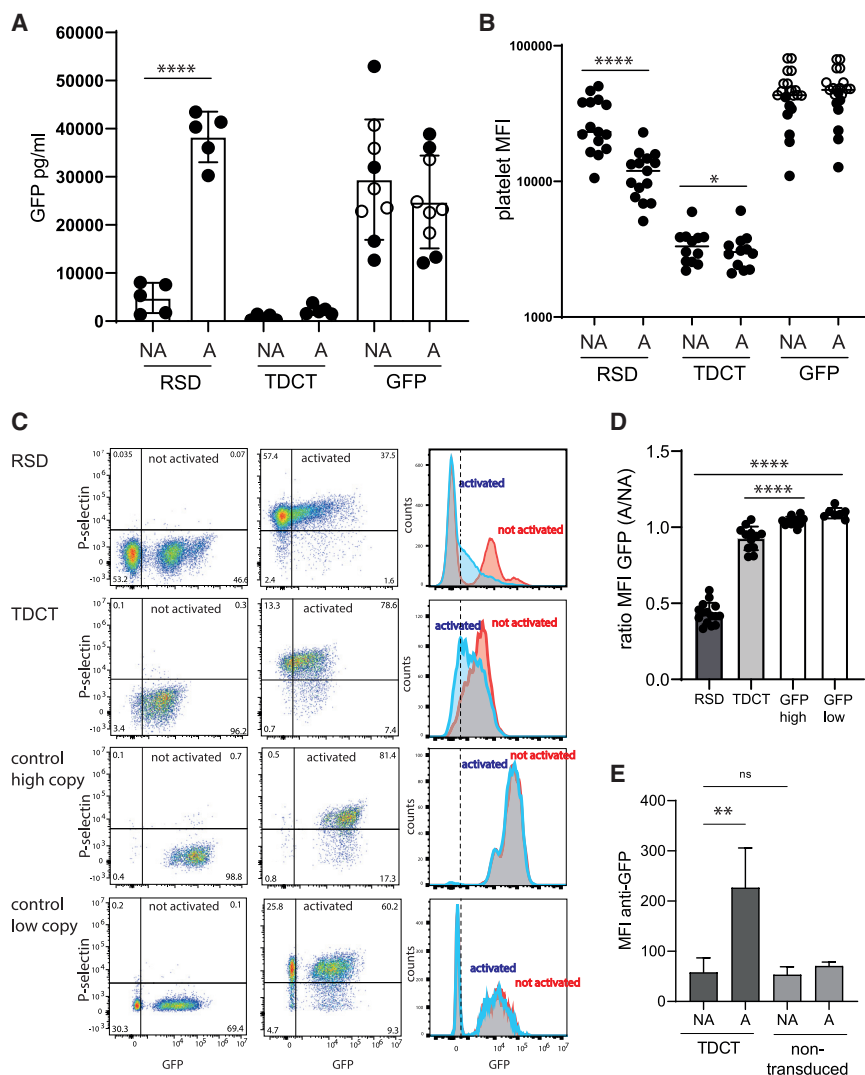

**Figure 4. GFP release from murine platelets activated with thrombin**

(A) Bar chart quantifying GFP in the supernatant of activated platelets by ELISA (n = 4–8 individually transplanted mice, Student's t test, \*\*\*\*p < 0.0001). Open circles: high-VCN mice; closed circles: low-VCN mice of the control group. (B) MFI of GFP in activated (A) and non-activated (NA) platelets (n = 11–15, Student's t test, paired, \*p = 0.02, \*\*\*\*p < 0.001). (C) Representative flow cytometry plots demonstrating GFP release after platelet activation for all three vectors (control showing a high and a low copy number example) and their corresponding overlay histogram. Activation is shown by the upregulation of P-selectin in A versus NA platelets. (D) Ratio of the MFI of GFP in platelets after activation compared with the MFI before activation with thrombin (ratio A/NA, n = 11–15, Student's t test, \*\*\*\*p < 0.0001). The platelets for analysis shown in (B) and (D) were taken several times from five (RSD), four (TDCT), or eight (control) mice by blood sampling at different times. (E) Quantification of surface GFP expression (MFI) from NA and A platelets from donor cells (TDCT) and recipient (non-transduced) (n = 4, individually transplanted mice, one-way ANOVA with Dunnett's correction; ns, not significant; \*\*p < 0.01).

confirmed that even though the RSD. $\text{IFN}\alpha$  encoded both  $\text{IFN}\alpha$  and EGFP as transgenes, only the  $\text{IFN}\alpha$  was specifically targeted to platelet  $\alpha$ Gs owing to the RSD fusion.

Although the PF4 promoter has high specificity for expression in MK, there was off-target expression in other blood cell lineages of between 5% and 13% (Figure S15C, also reported in Latorre-Rey et al.<sup>18</sup>). These cells would release  $\text{IFN}\alpha$ , and accordingly we detected human  $\text{IFN}\alpha$  in the blood ( $11.2 \pm 3.3$  ng/mL, Figure S15D) and the activation of  $\text{IFN}\alpha$ -inducible

the repressive effects from exogenous  $\text{IFN}\alpha$  administration on megakaryopoiesis were observed in this setting.<sup>21</sup>

To further investigate  $\alpha$ G targeting *in vivo*, we employed our murine BMT model as previously described. In this context, HSPCs from mTmG marker mice were transduced with the RSD. $\text{IFN}\alpha$  vector supernatant at MOI 2.5–5 and then transplanted into C57BL/6 recipients (Figures S15A and S15B). At this stage, we did not include the  $\text{IFN}\alpha$  control group because major side effects during hematopoietic recovery after BM transplantation due to  $\text{IFN}\alpha$  expression were expected. We next activated platelets isolated from transplanted mice with thrombin to investigate if we could release  $\text{IFN}\alpha$  from the  $\alpha$ Gs. Similar to what was observed for dsGFP, there was neither effective release nor retention of the EGFP transgene in A and NA platelets, respectively (Figure 5D). However, there was a highly significant amount of  $\text{IFN}\alpha$  secreted from A platelets (up to 20,000 pg/mL) compared with NA platelets ( $\sim 650$  pg/mL) (\*\*p < 0.01). These results

genes in the BM (Figure S15E). This did not induce disease symptoms in mice, but white blood cell counts recovered delayed after transplantation and the B cell contribution to lymphocytes was slightly reduced (Figure S9). Effects on B cell development after long-term exposure to  $\text{IFN}\alpha$  have been reported.<sup>22,23</sup> We did not observe alterations of platelet function, size, or numbers or neutropenia in these mice (Figures 5E and 5F; Figure S9C).

#### **$\text{IFN}\alpha$ released from modified platelets inhibits measles virus replication**

After proving the specific targeting of  $\text{IFN}\alpha$  to the  $\alpha$ Gs and release after stimulation, we tested the efficacy of the  $\text{IFN}\alpha$  released from platelets to suppress measles virus replication *in vitro* (vaccine strain MeV<sub>vac2</sub>(GFP)). Virus replication was quantified by the GFP-positive area. Platelets isolated from transplanted mice that expressed from the RSD. $\text{IFN}\alpha$  vector and activated with thrombin exhibited a dose-dependent inhibitory effect against MeV<sub>vac2</sub>(GFP) replication

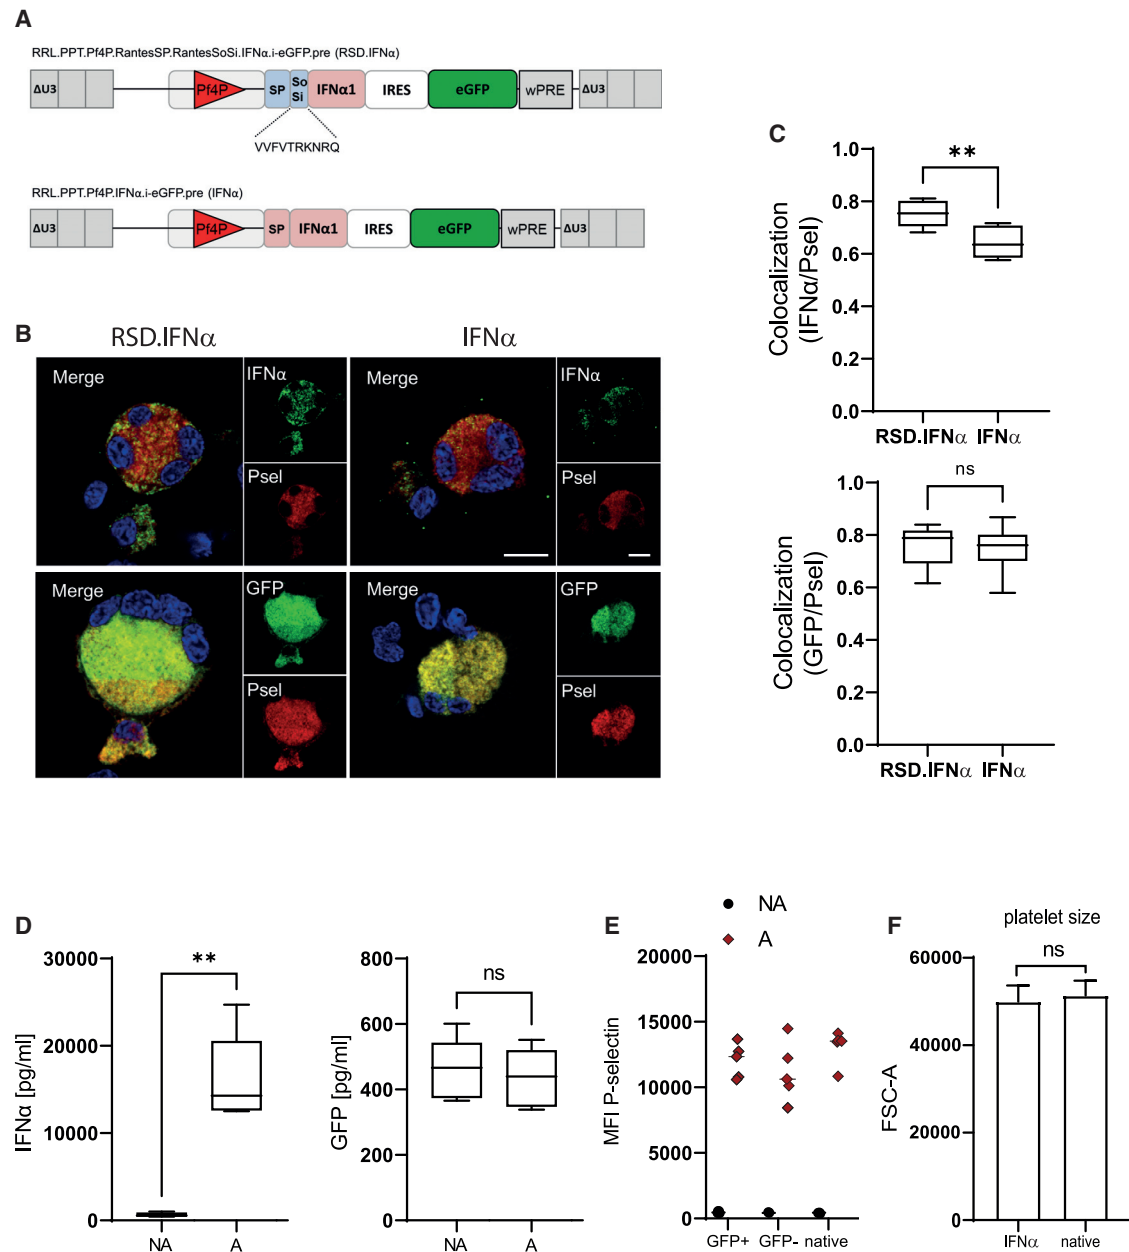

**Figure 5. Targeting of IFN $\alpha$  to the alpha granules**

(A) Design of third-generation SIN lentiviral vectors expressed from Pf4P. For the targeting of IFN $\alpha$  to  $\alpha$ Gs, the sorting domain and signal peptide of RANTES were fused to the N terminus of the IFN $\alpha$ 1 coding sequence without the IFN $\alpha$  signal peptide, plus an IRES-EGFP sequence (RSD.IFN $\alpha$  vector). As the control, only the full coding sequence of IFN $\alpha$  with its signal peptide was fused to the IRES.eGFP (IFN $\alpha$  vector). (B) Confocal images of RSD.IFN $\alpha$ - and IFN $\alpha$ -transduced CB-derived MKs showing transgenes (green), P-selectin (red), and DAPI (blue). IFN $\alpha$  was visualized with 1° human IFN $\alpha$ -1 Abs and 2° goat-anti-rabbit Alexa Fluor 647 Abs, P-selectin $^{+}$   $\alpha$ Gs were visualized with 1° human/mouse Abs and 2° goat-anti-mouse Cy3 Abs, and GFP was detected in the 488 channel without Ab staining. Images were acquired with a Leica Dmi8 Inverted-3 confocal microscope with a 63 $\times$  oil immersion objective and 4 $\times$  digital zoom; scale bar, 10  $\mu$ m. (C) Box-whisker plots showing colocalization of the GFP and IFN $\alpha$  transgenes with P-selectin $^{+}$   $\alpha$ Gs in CB-derived MKs. Line at median on boxplots, n = 8 MKs from two independent transductions; ns, not significant; \*\*p < 0.01, Mann-Whitney test. (D) ELISA results showing secretion of GFP and IFN $\alpha$  protein from NA and A murine platelets. Data represent median and range, n = 5 individually transplanted mice, \*\*p < 0.01, Mann-Whitney test. (E) MFI of P-selectin expression in A and NA GFP $^{+}$  and GFP $^{-}$  platelets. Native platelets shown for comparison. (F) Platelet size measured by the FSC-A of IFN $\alpha$ -positive and native platelets. (E and F) n = 5, platelets from five independent RSD.IFN $\alpha$  and mock mice, Student's t test with Welch's correction, ns, not significant.

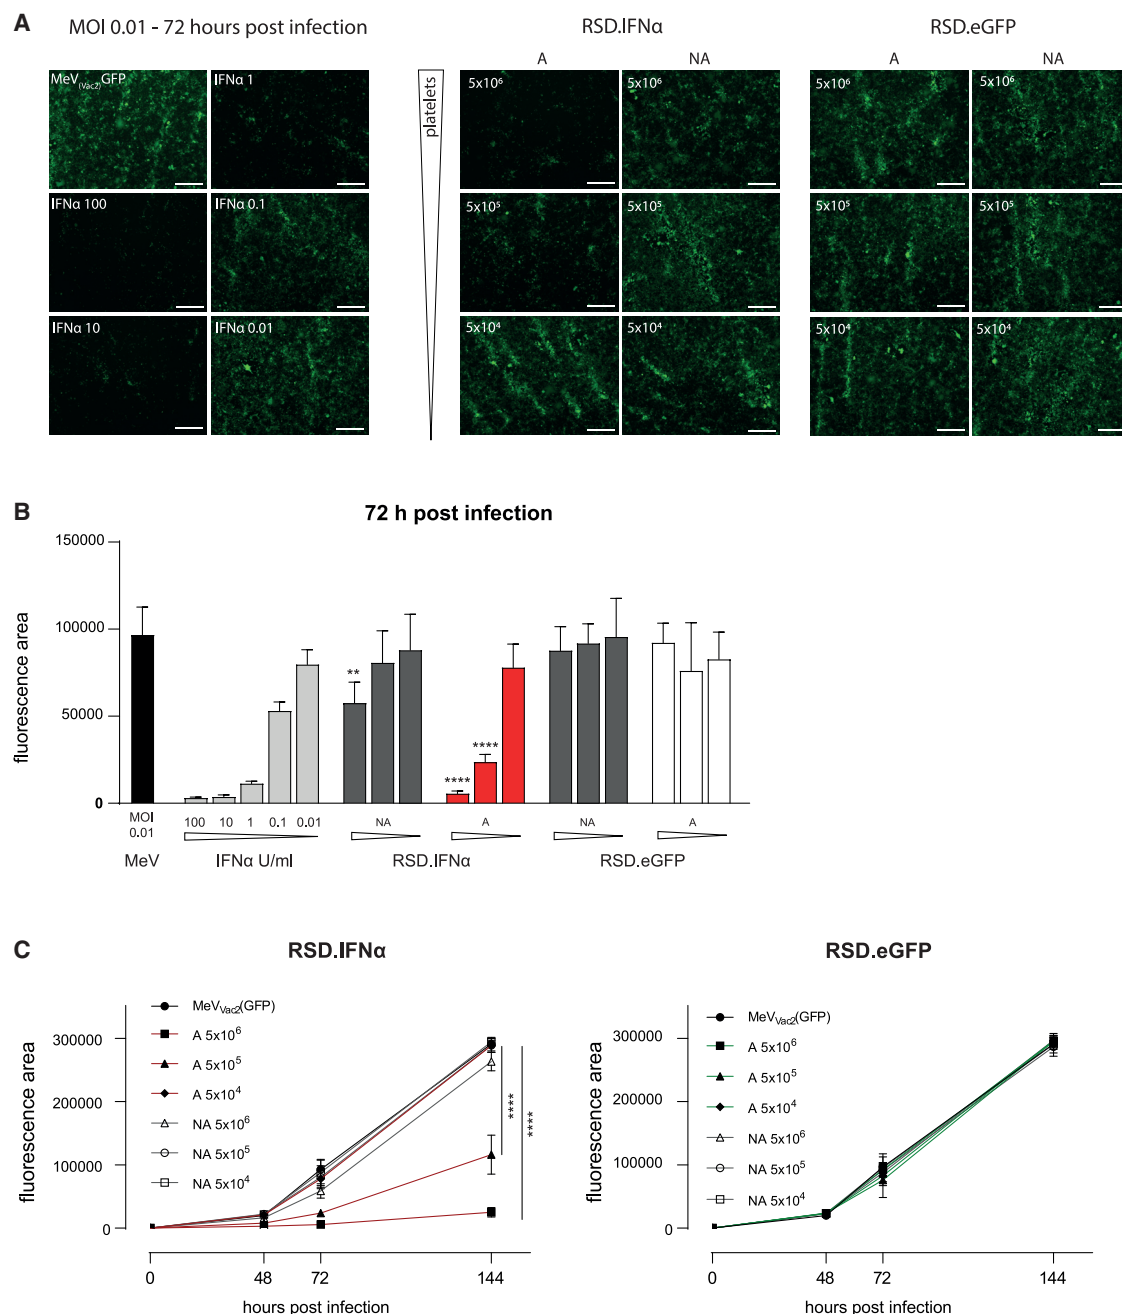

**Figure 6. Inhibition of virus replication by IFN $\alpha$  released from engineered platelets**

(A) Left: fluorescence images of Vero-E6 cells infected with MeV<sub>vac2</sub>(GFP) at MOI 0.01 at 72 h after infection (left top image) and Vero-E6 cells infected and treated with decreasing doses of IFN $\alpha$  (100–0.01 U). Right: Vero-E6 cells infected with MeV<sub>vac2</sub>(GFP) at MOI 0.01 and treated with  $5 \times 10^6$ ,  $5 \times 10^5$ , and  $5 \times 10^4$  A or NA platelets from RSD.IFN $\alpha$  or RSD.eGFP mice. Images were taken 72 h post infection. Magnification 40 $\times$ ; scale bar, 500  $\mu$ m. (B) Quantification of the fluorescence area, 72 h post infection (platelets of  $n = 3$  independent mice, mean  $\pm$  SD, three images per well). One-way ANOVA; multiple comparisons between A or NA platelets RSD.IFN $\alpha$  with RSD.eGFP within each platelet dilution \*\* $p > 0.01$ , \*\*\*\* $p > 0.0001$ . (C) Time course of virus replication measured by the fluorescence area 48, 72, and 144 h post infection (platelets of  $n = 3$ –5 independent mice, mean  $\pm$  SD, three images per well). Two-way ANOVA; multiple comparisons of RSD.IFN $\alpha$  with MeV<sub>vac2</sub>(GFP) control. \*\*\*\* $p < 0.0001$ .

(Figures 6A–6C; Figure S16). Inhibition by RSD.IFN $\alpha$ -activated platelets at the highest amount was comparable to 10 U/mL recombinant IFN $\alpha$  at 72 h postinfection. There was no ( $5 \times 10^5$  platelets) or

only minor ( $5 \times 10^6$  platelets) inhibition of virus replication in wells that were treated with NA RSD.IFN $\alpha$  platelets, indicating that there was no release from platelets without activation (Figures S16 and

S17). RSD.eGFP platelets, regardless of activation, did not suppress MeV<sub>vac2</sub>(GFP) replication and allowed replication similar to the MeV<sub>vac2</sub>(GFP) control (Figures 6A–6C).

## DISCUSSION

In our present work, lentiviral vector-mediated gene transfer was used to effectively target GFP and IFN $\alpha$  to  $\alpha$ Gs in MKs and platelets. In addressing some of the limitations of using larger  $\alpha$ G targeting domains such as the 400 aa vWF D2 by Du et al.,<sup>15</sup> we opted for the smaller and potentially more efficient sorting signal of RANTES (10 aa, RSD) and P-selectin transmembrane domain and cytoplasmic tail (57 aa, TDCT). Although both sequences have a human origin, they exhibit a high homology to the murine sequence (Figure S18). The RSD and TDCT vectors were very well equipped to load the transgenic proteins into  $\alpha$ Gs in murine and human MKs. The colocalization of the RSD.GFP with the  $\alpha$ G markers vWF and P-selectin was around 70% and recapitulates the observations by El Golli et al. in transfected AtT20 cells, demonstrating that the targeting was also efficient in MKs in the context of lentiviral transduction.<sup>10</sup> In platelets, the RSD fusion proteins were well retained in resting platelets and could be effectively released after activation. By comparison, the TDCT fusion retained the GFP signal on the platelets, and no release after activation could be measured. Cell-surface presentation of the TDCT-GFP fusion protein was further confirmed in the P-selectin-positive MEG-01 cells and activated platelets. However, the overall intensity of expression from the TDCT vector was lower compared with the RSD vector, although vector titers and transduction efficiencies were the same. One might argue that the differences in vector performance may be attributed to the nature of the protein fusion to dsGFP. The TDCT vector was designed with a polyglycine linker between dsGFP's C-terminal and TDCT's N-terminal domains in order to optimally circumvent steric effects, which have been described as having an impact on efficient protein folding, processing, or stability.<sup>24–26</sup> However, the reduced GFP intensity was accompanied by lower mRNA levels by the same VCN, arguing for reduced transcription from the genome copies and against issues with translation of TDCT. Notwithstanding, the TDCT vector can be improved in further studies. It is also not clear if the discrepancies observed in the functional characteristics would persist if other proteins were to be fused to the TDCT. The presentation of proteins on the platelets surface may be of special interest, e.g., in the context of coagulation factors that need the procoagulative platelet surface.

We were able to validate our proof of concept by targeting IFN $\alpha$  as a therapeutic cytokine showing effective packaging and release from platelet  $\alpha$ Gs. IFN $\alpha$  release was also effective at inhibiting measles virus replication *in vitro* in a controlled manner, as there was only minor inhibition when platelets were not activated. The rationale of targeting IFN $\alpha$  to  $\alpha$ Gs was due to its established antiviral and anti-tumor effects, which have already been applied in clinical settings.<sup>27–29</sup> Therefore, our successful strategy of packaging this potent cytokine in the  $\alpha$ Gs of the MK lineage serves as a solid platform to build upon with more advanced studies. Although we used the BMT model in our study, this was mainly done to generate fully functional platelets, which we then studied *ex vivo*. One may envision the

use of *in vitro*-generated and modified platelets for direct transfusion. In this case, the therapeutic effect would be very short term. On the other hand, IFN $\alpha$  expression in tumor-resident macrophages has been shown to be effective as antitumor therapy after transplantation of lentiviral-transduced hematopoietic stem cells (HSCs).<sup>30,31</sup> As platelets are attracted by tumor vessels,<sup>32,33</sup> a platelet-mediated IFN $\alpha$  delivery may be similarly applicable. However, to allow the safe expression of IFN $\alpha$  in platelets after transplantation of transduced HSCs, further modifications to the vector must be made to reduce the background expression in other blood cell lineages and, with this, limit systemic IFN $\alpha$  levels.

In summary, our study presents an adaptable platform for targeting proteins to platelet  $\alpha$ Gs based on lentiviral vectors to utilize platelets as vehicles to store, hide, and specifically deliver therapeutic proteins. Our novel vector platform should be applicable to a broader range of applications.

## MATERIALS AND METHODS

### Lentiviral vectors

The coding sequence of the fusion protein consisting of dsGFP fused with the signal peptide and sorting signal of human RANTES was amplified by PCR and inserted into the lentiviral vector expressing from the internal Pf4P (RSD vector). The RANTES signal peptide contains the first 23 aa, and the sorting signal comprises aa 62–72 of the RANTES protein. The human P-selectin transmembrane (aa 772–795) and cytoplasmic tail (aa 796–830) were fused to dsGFP by a polyglycine linker by ligating two PCR products. At the N terminus, the P-selectin signal peptide (41 aa) was fused to dsGFP. The whole coding sequence was then inserted downstream of the Pf4P in the lentiviral vectors (TDCT vector). To generate the dsGFP-expressing control vector, the EGFP of the vector RRL.PPT.Pf4P.eGFP.wPre, published by Latorre-Rey et al.,<sup>18</sup> was replaced by dsGFP.

Lentiviral vectors encoding IFN $\alpha$  were generated. In the first vector, the human cDNA of IFN $\alpha$ 1 without its signal peptide was PCR amplified and inserted into the lentiviral vector to generate a fusion protein with the RANTES signal peptide and sorting signal. The IFN $\alpha$  sequence was followed by an IRES-EGFP (RSD.IFN $\alpha$  vector). In the second vector, the full coding sequence of IFN $\alpha$ 1 with its signal peptide was PCR amplified and inserted into the lentiviral vector upstream of an IRES-EGFP sequence. This second vector was void of the RANTES sorting signal, thereby functioning as a control (IFN $\alpha$  vector).

### Generation of lentiviral vector supernatants

We seeded  $5 \times 10^6$  293T cells in 10 cm plates in DMEM, 10% fetal calf serum (FCS), 2 mM L-glutamine, 1% penicillin/streptomycin, and 20 mM HEPES and transfected them by calcium-phosphate transfection with 10  $\mu$ g of vector plasmid, 10  $\mu$ g of gag/pol plasmid (pCDA3.GP.4XC plasmid), 1.5  $\mu$ g of plasmid encoding the VSV-G envelope (pMD.G plasmid), and 5  $\mu$ g of Rev-encoding plasmid in DMEM supplemented with 25  $\mu$ M chloroquine. Supernatants were collected after 36 and 48 h, concentrated by high-speed centrifugation

at  $80,000g \times 2$  h, resuspended in StemSpan medium (STEMCELL Technologies, Köln, Germany), and stored at  $-80^{\circ}\text{C}$ . Vector titers were determined by transduction of murine SC-1 cells in serial dilutions followed by flow cytometry or VCN detection by qPCR.

#### Isolation and transduction of murine lineage marker-negative ( $\text{lin}^{-}$ ) BM cells

BM was flushed from femora, tibiae, and hip bones of C57BL/6 mice or mTmG marker mice (B6.129-Gt(ROSA)26Sor<sup>+</sup>/tm4(ACTB-tetO-mCherry-EGFP)LoxP/J). Mononuclear cells were purified by gradient centrifugation (Histopaque 1083, Sigma-Aldrich, Munich, Germany) at  $800g$ , 20 min, room temperature (RT).  $\text{Lin}^{-}$  cells were selected by magnetic cell sorting using the following lineage-specific antibodies: anti-CD5, CD45R (B220), CD11b, Gr-1 (Ly-6G/C), 7-4, and Ter-119 (Miltenyi Biotech, Bergisch Gladbach, Germany). Briefly, cells were incubated with the biotin-labeled antibody cocktail for 20 min at  $4^{\circ}\text{C}$ , followed by the secondary antibody (anti-biotin microbeads) for 20 min at  $4^{\circ}\text{C}$ . Antibody-labeled cells were run over a separation column and the  $\text{lin}^{-}$  population was collected from the flow-through. Purified cells were cultivated in a serum-free medium (StemSpan SFEM, STEMCELL Technologies, Köln, Germany), 10 ng/mL mSCF, 20 ng/mL mTHPO, 20 ng/mL mIGF2, 10 ng/mL hFGF-1, 2 mM glutamine, and 1% penicillin/streptomycin. After prestimulation for 24 h,  $\text{lin}^{-}$  cells were transduced twice on two consecutive days with lentiviral vectors on RetroNectin-coated wells (Takara-Clontech,  $10 \mu\text{g}/\text{cm}^2$ , 24 or 12 well plates, depending on cell number), with a defined MOI of 2.5–5. For the differentiation to MKs, cells were cultured in a serum-free medium containing 50 ng/mL THPO for up to 3 weeks. Surface-marker expression was evaluated via flow cytometry by staining harvested murine MKs with anti-CD41-PerCP Cy5.5 (MWReg30, BioLegend, San Diego, CA) and anti-CD42d-APC (1C2, eBioscience, Thermo Fisher Scientific, Waltham, MA, USA) antibodies. DNA content/polyploidy analysis was performed by staining ethanol-fixed cells with propidium iodide (PI) staining solution (50  $\mu\text{g}/\text{mL}$  PI, 0.1 mg/mL RNase A, 0.05% Triton-X-100, PBS) and then performing flow cytometry. The Cytoflex flow cytometer was used for analysis (Beckman Coulter, Krefeld, Germany).

#### Isolation and transduction of primary human CD34<sup>+</sup> cells

Human umbilical CB or G-CSF-mobilized peripheral blood (PB) and BM samples were collected after written donor consent at the Hannover Medical School and German Red Cross, respectively. Mononuclear cells were purified by gradient centrifugation (Biocoll Separating Solution, Biochrom, Berlin, Germany) at  $400g$ , 40 min, at RT. CD34<sup>+</sup> HSPCs were positively selected by magnetic cell sorting using the human CD34 MicroBead Kit (Miltenyi Biotech, Bergisch Gladbach, Germany). Briefly, cells were incubated with the CD34 microbeads and FcR blocking reagent for 30 min at  $4^{\circ}\text{C}$ . The cells were run over a separation column and the flow-through was discarded, and magnetically labeled CD34<sup>+</sup> cells were eluted into a new collection tube after removal of the separation column from the magnetic rack. CD34<sup>+</sup> cells were cultivated in StemSpan SFEM (STEMCELL Technologies), 100 ng/mL hFLT-3 ligand, 100 ng/mL hSCF, 50 ng/mL hTHPO, 2 mM L-glutamine, and 1% penicillin/streptomycin. Af-

ter 24 h expansion, CD34<sup>+</sup> cells were subjected to a single round of transduction with lentiviral vectors on RetroNectin-coated wells (Takara-Clontech, Kusatsu, Japan;  $10 \mu\text{g}/\text{cm}^2$ , 48 well plates,  $1 \times 10^5$  cells/well) with defined MOI of 5–40.

#### Differentiation and characterization of primary human megakaryocytes

Lentiviral- and mock-transduced CD34<sup>+</sup> cells were seeded in 24 well suspension plates at a cell density of  $5 \times 10^5$  cells/well for differentiation in StemSpan SFEMII medium (STEMCELL Technologies), 50 ng/mL hTHPO, 25 ng/mL hSCF, and 7.5 ng/mL hIL-6. From day 6, the SFEMII medium was supplemented with only 50 ng/mL hTHPO and 25 ng/mL hSCF until the end of the differentiation period of 14 days. Surface-marker expression was evaluated via flow cytometry by staining harvested MKs with anti-CD41-APC-Cy7 (HIP8; BioLegend, San Diego, CA, USA) and anti-CD42b-PerCP (HIP1; BioLegend, San Diego, CA, USA) antibodies. In addition, DNA content analysis was performed by staining ethanol-fixed cells with PI staining solution (50  $\mu\text{g}/\text{mL}$  PI, 0.1 mg/mL RNase A, 0.05% Triton-X-100, PBS) and then performing flow cytometry. The Cytoflex flow cytometer was used for analysis (Beckman Coulter, Krefeld, Germany).

#### Immunofluorescence and confocal analysis

Human and murine culture-derived MKs were spun onto coverslips at 400 rpm for 10 min using the CytoSpin4 cytocentrifuge (Thermo Fisher Scientific). MKs were fixed in 4% paraformaldehyde (PFA) for 15 min at RT and permeabilized with 0.5% Triton X-100 in PBS for 10 min at RT. After rehydration with PBS, blocking was done in 10% bovine serum albumin (BSA) (Carl Roth, Karlsruhe, Germany) in PBS for 1 h at RT. Incubation with the primary antibodies anti-vWF (1:100) (Abcam, Catalog No. ab9378), murine anti-human/mouse CD62P-PE (1:100) (eBioscience, Catalog No. 12-0626-82), and rabbit anti-IFN- $\alpha$  (1:50) (Novus Biologicals, Catalog No. 31101-1) was carried out for 1 h at RT. After subsequent washing steps, incubation with the secondary antibodies goat anti-rabbit IgG Alexa Fluor 647 (1:2,000) (Invitrogen, Catalog No. A21245) and goat anti-mouse IgG Cy3 (Invitrogen, Catalog No. A10521) and nuclear counterstain 4',6-diamidino-2-phenylindole (DAPI) (1:5,000) (Sigma-Aldrich, Seelze, Germany) was performed for 1 h at RT. Washed coverslips were then mounted onto glass slides in Dako Fluoromount aqueous mounting medium (Dako, Carpinteria, CA, USA), allowed to dry overnight at RT in the dark, and then transferred to  $4^{\circ}\text{C}$  for storage. Cells were acquired with the LSM510 Axiovert200M confocal microscope (Zeiss, Oberkochen, Germany) or the DMi8 Inverted-3 confocal microscope (Leica, Wetzlar, Germany) using appropriate filter sets. MEG-01 cells transduced with the targeting vectors (MOI 1) were fixed with 4% PFA for 15 min and permeabilized with 0.5% Triton X-100 in PBS for 30 min. Cells were incubated with primary antibodies anti-vWF (1:100) in PBS with 2% FCS overnight at  $4^{\circ}\text{C}$ . Cells were washed and incubated with secondary antibodies goat anti-rabbit IgG Alexa Fluor 647 (1:1,000) and DAPI (1:5,000) for 1 h at RT. About  $5 \times 10^5$  cells/well were transferred into the CellCarrier-96 plate (PerkinElmer, Waltham, MA, USA)

and confocal images were acquired with the Operetta high-content imaging system (PerkinElmer, Waltham, MA, USA).

#### Colocalization analysis of murine and human megakaryocytes

$\alpha$ G targeting efficiency of the vectors was determined by evaluating the colocalization of transgenes with the  $\alpha$ G marker proteins vWF and P-selectin. The Zen Blue software (Zeiss) and the JaCoPx plugin<sup>34</sup> of the FIJI image analysis software<sup>35</sup> was used. Murine MKs were acquired with the LSM 510, Axiovert200M confocal microscope (Zeiss) using a 100 $\times$  oil immersion objective in a 512  $\times$  512 format with an image size of 127.28  $\times$  127.28  $\mu$ m. Colocalization of the samples with the Zen Blue software was determined by using single-stained controls to set the crosshairs for intensity thresholds so that a pixel-by-pixel comparison could be made for the selected channels. Applying the weighted colocalization coefficient (WCC) took into account the intensity value of the summed pixels, where the value of each pixel is equal to its intensity value. Human MKs were acquired with the DMi8 Inverted-3 confocal microscope (Leica), using a 63 $\times$  oil immersion objective in a 1,024  $\times$  1,024 format. Image sizes were 92.26  $\times$  92.26  $\mu$ m or 46.13  $\times$  46.13  $\mu$ m when 4 $\times$  digital zoom was applied. Since the LAS X (Leica) image processing software does not include a built-in weighted colocalization tool, FIJI was used for this purpose. Confocal images of transduced MEG-01 cells were acquired with the Operetta high-content imaging system using a 40 $\times$  high numerical aperture objective in a 1,360  $\times$  1,024 format with an image size of 88.0  $\times$  66.0  $\mu$ m. The rank weighted colocalization (RWC) algorithm of JaCoPx was applied to cell images using default thresholds in order to obtain a pixel and intensity correlation value, which has been described as being superior to traditional methods of colocalization.<sup>36</sup> For both RWC and WCC analyses, values ranging from 0 (no colocalization) to 1 (complete colocalization) were obtained corresponding to the colocalization of the transgenes encoded by targeting and non-targeting vectors with the individual  $\alpha$ G marker proteins. Although murine and human cells were analyzed differently, the bases of pixel and intensity cooccurrence and correlation were comparable, and the colocalization coefficients are derivatives from Pearson's correlation coefficient.<sup>37</sup> Therefore, colocalization results in the present work are displayed as "colocalization" for uniformity.

#### Bone marrow transplantation

Animal experiments were carried out according to the German animal protection laws and were approved by the local animal welfare committee (Regierungspräsidium Darmstadt). C57BL/6 mice (obtained from Janvier or Charles River) were preconditioned with 7 Gy, 137Cs-g rays, 0.036 Gy/s irradiation and transplanted with a minimum of 5  $\times$  10<sup>5</sup> cells 1 day after their transduction. Donor cells were derived from mTmG marker mice. Cell infusion was performed via tail vein injection in 100  $\mu$ L PBS. All mice were kept in the specific-pathogen-free animal facilities of the Paul-Ehrlich-Institute, Langen, Germany. To circumvent infection-associated complications after irradiation, antibiotics were supplied in the first 3 weeks after transplantation (Ciprofloxacin 0.1 mg/mL in drinking water). After 6 weeks, and then every 3 weeks, blood samples of transplanted mice were

collected via retro-orbital bleeding. Blood cell counts were determined using a VetABC hemocytometer (Scil Animal Care Company, Viernheim, Germany). Chimerism was determined by detecting dTomato from donor mice on leukocytes (after erythrocyte lysis) or in platelets. Platelets were stained with CD41-APC (clone eBioM-WReg30, Thermo Fisher Scientific). Flow cytometry was carried out using the Cytotflex (Beckman Coulter).

#### Platelet activation and ELISA

One hundred microliters of mouse blood was collected in 300  $\mu$ L heparin in PBS (25 U/mL). Blood cells were then washed twice with Tyrode's buffer (20 $\times$  Tyrode's buffer: 2.73 M NaCl, 53.6 mM KCl, 238 mM NaHCO<sub>3</sub>, 8 mM Na<sub>2</sub>HPO<sub>4</sub>, 0.5 M HEPES) plus 0.36% BSA, 0.1% glucose, and 1 mM MgCl<sub>2</sub> and separated by centrifugation with 800g, 5 min at RT. Cells were then resuspended in 750  $\mu$ L Tyrode's buffer containing 2 mM CaCl<sub>2</sub>. Fifty microliters from the sample was activated with thrombin (0.1 U, 6 min at 37°C, 6 min at RT) and stained with antibodies detecting CD41-PerCP-Cy5.5 (clone MWReg30; BioLegend) and P-selectin-APC (clone Psel.KO2.3; Thermo Fisher Scientific). Before cytometric analysis, 1–2 mL fluorescence-activated cell sorting (FACS) buffer (5 mM EDTA, 2% FCS, PBS) was added. If GFP or IFN $\alpha$  was measured in the platelet supernatant by ELISA, the remaining blood sample was split into two tubes, of which only one was activated with thrombin. Leukocytes were separated by centrifugation at 250g, 5 min at RT, and platelet-containing supernatants were collected. A and NA platelet samples were centrifuged at 800g, 5 min at RT, and supernatants (150  $\mu$ L each) and pellets were collected. GFP or IFN $\alpha$  proteins in the platelet supernatants were measured using the GFP ELISA kit (Cell Biolabs, San Diego, CA, USA) or human IFN- $\alpha$  ELISA PRO kit (Mabtech, Nacka Strand, Sweden), respectively, following the manufacturers' instructions.

#### Virus replication assay

African green monkey kidney Vero-E6 cells (8  $\times$  10<sup>4</sup>) were seeded in 48 well plates and grown for 24 h in DMEM (BioWest) supplemented with 5% FCS and 2 mM L-glutamine. The medium was replaced, and the 90% confluent cells were infected with a vaccine measles virus (MeV) strain (Vac2) expressing enhanced GFP from an additional transcription unit downstream of H (MeV<sub>Vac2</sub>(GFP)),<sup>38</sup> kindly provided by C.K. Pfaller, Paul-Ehrlich-Institute) at an MOI of 0.01 in 250  $\mu$ L Opti-MEM (Thermo Fisher Scientific) without additives for 2 h at 32°C. The medium was then replaced with DMEM containing 10% FCS, 2 mM L-glutamine, and 1% penicillin/streptomycin. Platelets were isolated into Tyrode's buffer as described above. Then, 5  $\times$  10<sup>6</sup>, 5  $\times$  10<sup>5</sup>, or 5  $\times$  10<sup>4</sup> platelets were added to the infected Vero cells and activated with thrombin (5 U/mL) (A) or not activated (NA). As a control, recombinant human IFN $\alpha$  (PBL Assay Science, Piscataway, NJ, USA) was used at concentrations of 100–0.01 U per well. Cells were incubated at 32°C in a humidified atmosphere containing 5% CO<sub>2</sub> for 6 days. MeV<sub>Vac2</sub>(GFP) replication was measured by GFP-fluorescence microscopy (Nikon ECLIPSE Ti-S) at 48, 72, and 144 h post infection. Three pictures per well and per condition were taken (magnification 4 $\times$ , exposure 100 ms, camera Nikon DIGITAL SIGHT DS-QiMc-U3, and software Nikon Nis-Elements

4.20.00 LO) and the area of GFP fluorescence was analyzed with ImageJ with set thresholds from 40 to 255 to exclude the background signal from the GFP-positive platelets.

### Detection of the mean vector copy number by PCR

TaqMan real-time PCR was performed with the TaqMan Fast Advanced Master Mix (Thermo Fisher Scientific). VCN was determined on genomic DNA from blood cells or culture-derived cells isolated using the NucleoSpin Tissue Kit (Macherey-Nagel, Düren, Germany), using specific primers and probes complementary to the wPre element or PTBP2 as a housekeeping gene. VCN was calculated by normalization to the housekeeping gene and quantification by a plasmid standard. PCRs were run on the StepOnePlus Real-Time PCR System (Applied Biosystems, Waltham, MA, USA).

### Gene-expression PCR

RNA was isolated using the Direct-zol RNA Microprep Kit (Zymo Research, Irvine, CA, USA) and reverse transcribed using RevertAid H Minus reverse transcriptase (Thermo Fisher Scientific) following the manufacturers' protocols. Expression levels of dsGFP were analyzed relative to  $\beta$ -actin (Primer Probe Set, Thermo Fisher Scientific) as a housekeeping gene. Primers and probe for dsGFP were used in concentrations of 900 and 250 nM, respectively.

### SUPPLEMENTAL INFORMATION

Supplemental information can be found online at <https://doi.org/10.1016/j.omtn.2021.12.038>.

### ACKNOWLEDGMENTS

We thank Christian Pfaller, Division of Veterinary Medicine, Paul-Ehrlich-Institute, for providing the MeV<sub>vac2</sub>(GFP) virus and Nina Hein-Fuchs, Research Group Host-Pathogen Interactions, Paul-Ehrlich-Institute, for assistance with the Operetta system for confocal images. This work was supported by the German Research Foundation (DFG; individual grants Mo860/5-1, Mo886/8-1, and REBIRTH Cluster of Excellence [EXC62]) and the REBIRTH Research Center for Translational Regenerative Medicine (ZN3440, State of Lower Saxony, Ministry of Science and Culture [Nieders. Vorab]).

### AUTHOR CONTRIBUTIONS

V.W. and L.L. generated vectors. V.W., L.L., and M.R. performed colocalization experiments, V.W. and L.L. assisted with the BM transplantation experiments, and analyzed data. M.R. and F.S. performed BM transplantation and virus replication assays and analyzed data. T.M. and U.M. designed the project and analyzed data. V.W., M.R., T.M., and U.M. wrote the manuscript.

### DECLARATION OF INTERESTS

The authors declare no competing interests.

### REFERENCES

- Hu, C.-M.J., Fang, R.H., Wang, K.-C., Luk, B.T., Thamphiwatana, S., Dehaini, D., Nguyen, P., Angsantikul, P., Wen, C.H., Kroll, A.V., et al. (2015). Nanoparticle bio-interfacing by platelet membrane cloaking. *Nature* 526, 118–121.
- Xu, P., Zuo, H., Chen, B., Wang, R., Ahmed, A., Hu, Y., and Ouyang, J. (2017). Doxorubicin-loaded platelets as a smart drug delivery system: an improved therapy for lymphoma. *Sci. Rep.* 7, 42632.
- Lyde, R., Sabatino, D., Sullivan, S.K., and Poncz, M. (2015). Platelet-delivered therapeutics. *J. Thromb. Haemost.* 13, S143–S150.
- Hyslop, S.R., and Josefsson, E.C. (2017). Undercover agents: targeting tumours with modified platelets. *Trends Cancer* 3, 235–246.
- Cai, Y., and Shi, Q. (2020). Platelet-targeted FVIII gene therapy restores hemostasis and induces immune tolerance for hemophilia A. *Front. Immunol.* 11, 964.
- Harrison, P., Savidge, G.F., and Cramer, E.M. (1990). The origin and physiological relevance of alpha-granule adhesive proteins. *Br. J. Haematol.* 74, 125–130.
- Harrison-Lavoie, K.J., Michaux, G., Hewlett, L., Kaur, J., Hannah, M.J., Lui-Roberts, W.W.Y., Norman, K.E., and Cutler, D.F. (2006). P-selectin and CD63 use different mechanisms for delivery to Weibel-Palade bodies. *Traffic* 7, 647–662.
- Disdier, M., Morrissey, J.H., Fugate, R.D., Bainton, D.F., and McEver, R.P. (1992). Cytoplasmic domain of P-selectin (CD62) contains the signal for sorting into the regulated secretory pathway. *Mol. Biol. Cell* 3, 309–321.
- Hartwell, D.W., Mayadas, T.N., Berger, G., Frenette, P.S., Rayburn, H., Hynes, R.O., and Wagner, D.D. (1998). Role of P-selectin cytoplasmic domain in granular targeting in vivo and in early inflammatory responses. *J. Cell Biol.* 143, 1129–1141.
- El Golli, N., Issertial, O., Rosa, J.-P., and Briquet-Laugier, V. (2005). Evidence for a granule targeting sequence within platelet factor 4. *J. Biol. Chem.* 280, 30329–30335.
- Briquet-Laugier, V., Lavenu-Bombled, C., Schmitt, A., Leboeuf, M., Uzan, G., Dubart-Kupperschmitt, A., and Rosa, J.-P. (2004). Probing platelet factor 4 alpha-granule targeting. *J. Thromb. Haemost.* 2, 2231–2240.
- Blagoveshchenskaya, A.D., Hannah, M.J., Allen, S., and Cutler, D.F. (2002). Selective and signal-dependent recruitment of membrane proteins to secretory granules formed by heterologously expressed von Willebrand factor. *Mol. Biol. Cell* 13, 1582–1593.
- Hayward, C.P., Song, Z., Zheng, S., Fung, R., Pai, M., Massé, J.M., and Cramer, E.M. (1999). Multimerin processing by cells with and without pathways for regulated protein secretion. *Blood* 94, 1337–1347.
- Handagama, P., Scarborough, R.M., Shuman, M.A., and Bainton, D.F. (1993). Endocytosis of fibrinogen into megakaryocyte and platelet alpha-granules is mediated by alpha IIb beta 3 (glycoprotein IIb-IIIa). *Blood* 82, 135–138.
- Du, L.M., Nurden, P., Nurden, A.T., Nichols, T.C., Bellinger, D.A., Jensen, E.S., Haberichter, S.L., Merricks, E., Raymer, R.A., Fang, J., et al. (2013). Platelet-targeted gene therapy with human factor VIII establishes haemostasis in dogs with haemophilia A. *Nat. Commun.* 4, 2773.
- Haberichter, S.L., Jozwiak, M.A., Rosenberg, J.B., Christopherson, P.A., and Montgomery, R.R. (2002). The von Willebrand factor propeptide (VWFpp) traffics an unrelated protein to storage. *Arterioscler. Thromb. Vasc. Biol.* 22, 921–926.
- Haberichter, S.L., Jacobi, P., and Montgomery, R.R. (2003). Critical independent regions in the VWF propeptide and mature VWF that enable normal VWF storage. *Blood* 101, 1384–1391.
- Latorre-Rey, L.J., Winterle, S., Dütting, S., Kohlscheen, S., Abel, T., Schenk, F., Wingert, S., Rieger, M.A., Nieswandt, B., Heinz, N., et al. (2017). Targeting expression to megakaryocytes and platelets by lineage-specific lentiviral vectors. *J. Thromb. Haemost.* 15, 341–355.
- Battinelli, E.M., Thon, J.N., Okazaki, R., Peters, C.G., Vijey, P., Wilkie, A.R., Noetzi, L.J., Flaumenhaft, R., and Italiano, J.E. (2019). Megakaryocytes package contents into separate  $\alpha$ -granules that are differentially distributed in platelets. *Blood Adv.* 3, 3092–3098.
- Italiano, J.E., and Battinelli, E.M. (2009). Selective sorting of alpha-granule proteins. *J. Thromb. Haemost.* 7, 173–176.
- Wang, Q., Miyakawa, Y., Fox, N., and Kaushansky, K. (2000). Interferon-alpha directly represses megakaryopoiesis by inhibiting thrombopoietin-induced signaling through induction of SOCS-1. *Blood* 96, 2093–2099.
- Di Scala, M., Gil-Fariña, I., Vanrell, L., Sánchez-Bayona, R., Aligned, D., Olagüe, C., Vales, A., Berraondo, P., Prieto, J., and González-Aseguinolaza, G. (2015). Chronic exposure to IFN $\alpha$  drives medullar lymphopoiesis towards T-cell differentiation in mice. *Haematologica* 100, 1014–1022.

23. Fallet, B., Narr, K., Ertuna, Y.I., Remy, M., Sommerstein, R., Cornille, K., Kreutzfeldt, M., Page, N., Zimmer, G., Geier, F., et al. (2016). Interferon-driven deletion of anti-viral B cells at the onset of chronic infection. *Sci. Immunol.* *1*, eaah6817.
24. Huang, L., Pike, D., Sleat, D.E., Nanda, V., and Lobel, P. (2014). Potential pitfalls and solutions for use of fluorescent fusion proteins to study the lysosome. *PLoS One* *9*, e88893.
25. Krishna, M.M.G., and Englander, S.W. (2005). The N-terminal to C-terminal motif in protein folding and function. *Proc. Natl. Acad. Sci. U S A* *102*, 1053–1058.
26. Thomas, C.L., and Maule, A.J. (2000). Limitations on the use of fused green fluorescent protein to investigate structure-function relationships for the cauliflower mosaic virus movement protein. *J. Gen. Virol.* *81*, 1851–1855.
27. Li, S.-F., Gong, M.-J., Zhao, F.-R., Shao, J.-J., Xie, Y.-L., Zhang, Y.-G., and Chang, H.-Y. (2018). Type I interferons: distinct biological activities and current applications for viral infection. *Cell Physiol. Biochem.* *51*, 2377–2396.
28. Saleki, K., Yaribash, S., Banazadeh, M., Hajihosseini, E., Gouravani, M., Saghazadeh, A., and Rezaei, N. (2021). Interferon therapy in patients with SARS, MERS, and COVID-19: a systematic review and meta-analysis of clinical studies. *Eur. J. Pharmacol.* *906*, 174248.
29. Zitvogel, L., Galluzzi, L., Kepp, O., Smyth, M.J., and Kroemer, G. (2015). Type I interferons in anticancer immunity. *Nat. Rev. Immunol.* *15*, 405–414.
30. Escobar, G., Barbarossa, L., Barbiera, G., Norelli, M., Genua, M., Ranghetti, A., Plati, T., Camisa, B., Brombin, C., Cittaro, D., et al. (2018). Interferon gene therapy reprograms the leukemia microenvironment inducing protective immunity to multiple tumor antigens. *Nat. Commun.* *9*, 2896.
31. Catarinella, M., Monestiroli, A., Escobar, G., Fiocchi, A., Tran, N.L., Aiolfi, R., Marra, P., Esposito, A., Cipriani, F., Aldrighetti, L., et al. (2016). IFN $\gamma$  gene/cell therapy curbs colorectal cancer colonization of the liver by acting on the hepatic microenvironment. *EMBO Mol. Med.* *8*, 155–170.
32. Gaertner, F., and Massberg, S. (2019). Patrolling the vascular borders: platelets in immunity to infection and cancer. *Nat. Rev. Immunol.* *19*, 747–760.
33. Yan, M., and Jurasz, P. (2016). The role of platelets in the tumor microenvironment: from solid tumors to leukemia. *Biochim. Biophys. Acta* *1863*, 392–400.
34. Singan, V.R., and Simpson, J.C. (2016). Implementation of the Rank-Weighted Colocalization (RWC) algorithm in multiple image analysis platforms for quantitative analysis of microscopy images. *Source Code Biol. Med.* *11*, 2.
35. Schindelin, J., Arganda-Carreras, I., Frise, E., Kaynig, V., Longair, M., Pietzsch, T., Preibisch, S., Rueden, C., Saalfeld, S., Schmid, B., et al. (2012). Fiji: an open-source platform for biological-image analysis. *Nat. Methods* *9*, 676–682.
36. Singan, V.R., Jones, T.R., Curran, K.M., and Simpson, J.C. (2011). Dual channel rank-based intensity weighting for quantitative co-localization of microscopy images. *BMC Bioinformatics* *12*, 407.
37. Dunn, K.W., Kamocka, M.M., and McDonald, J.H. (2011). A practical guide to evaluating colocalization in biological microscopy. *Am. J. Physiol. Cell Physiol.* *300*, C723–C742.
38. Del Valle, J.R., Devaux, P., Hodge, G., Wegner, N.J., McChesney, M.B., and Cattaneo, R. (2007). A vectored measles virus induces hepatitis B surface antigen antibodies while protecting macaques against measles virus challenge. *J. Virol.* *81*, 10597–10605.

**Supplemental information**

**Targeting transgenic proteins to alpha granules  
for platelet-directed gene therapy**

**Vanessa M.A. Woods, Lisette J. Latorre-Rey, Franziska Schenk, Marcel G.E. Rommel, Thomas Moritz, and Ute Modlich**

A

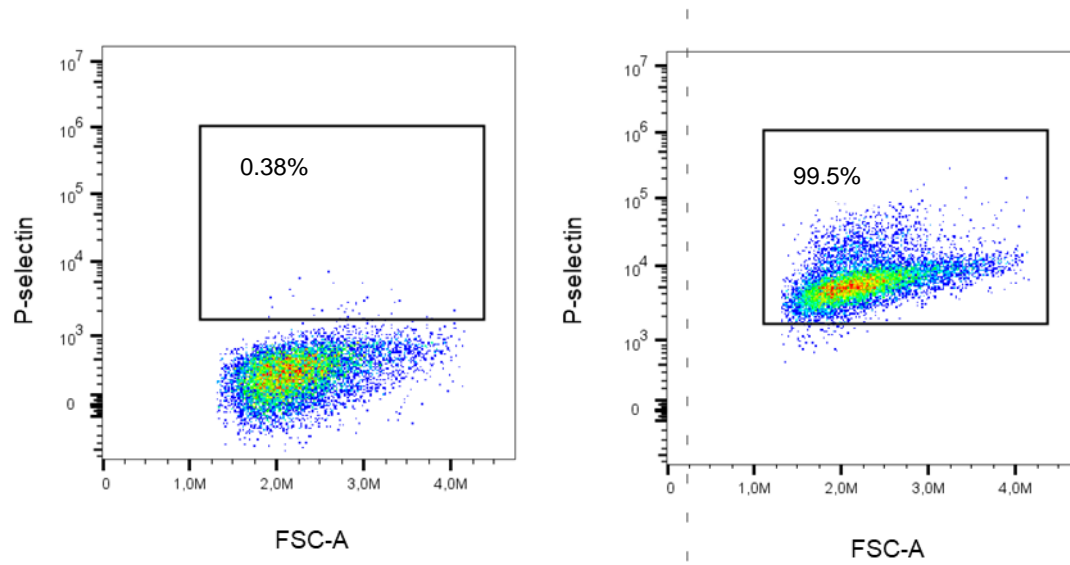**Supplemental Figure S1: P-selectin surface expression on MEG-01 cells**

Representative flow cytometry plots showing P-selectin expression on MEG-01 cells (left: unstained and right: stained).

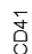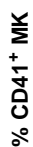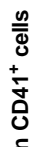

D

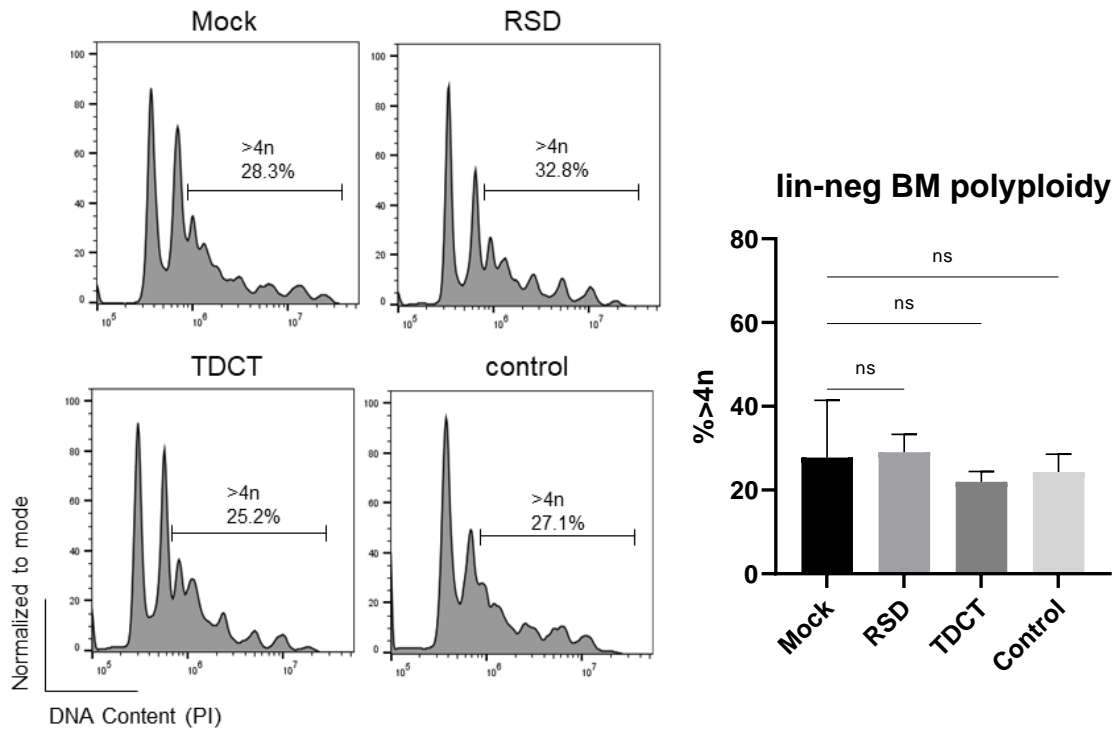

### Supplementary Figure S2: Characterization of *in vitro* differentiated murine MK.

Murine lineage marker negative BM cells from C57BL6 mice were transduced with alpha granule targeting vectors (RSD, TDCT) or the non-targeting control or not transduced (Mock), followed by differentiation towards MK using murine THPO (50 ng/ml). **(A)** Representative dot plots showing CD41<sup>+</sup>/CD42d<sup>+</sup> surface marker expression of lineage marker negative derived MK at different time-points for transduced and non-transduced (Mock) cells. **(B)** Summary of percentages CD41<sup>+</sup> and CD41<sup>+</sup>/CD42d<sup>+</sup> MK harvested at the indicated time-points (n = 6; two independent transductions). **(C)** Percentage of GFP expressing cells in MK (CD41<sup>+</sup>) and non-megakaryocytes/non-differentiated cells (CD41<sup>-</sup>) differentiated from lineage marker BM cells (n=6). **(D)** Representative flow cytometry histograms and quantification of DNA content of mature MK (>4n) stained with propidium iodide (PI) staining solution (n=4-5, two independent transduction). All data are shown as mean ± SD. Multiple comparisons in (B) to the Mock sample were performed by Two-Way ANOVA with Sidaks comparison test and (D) One-way ANOVA with Dunett's comparison test ns = not significant.

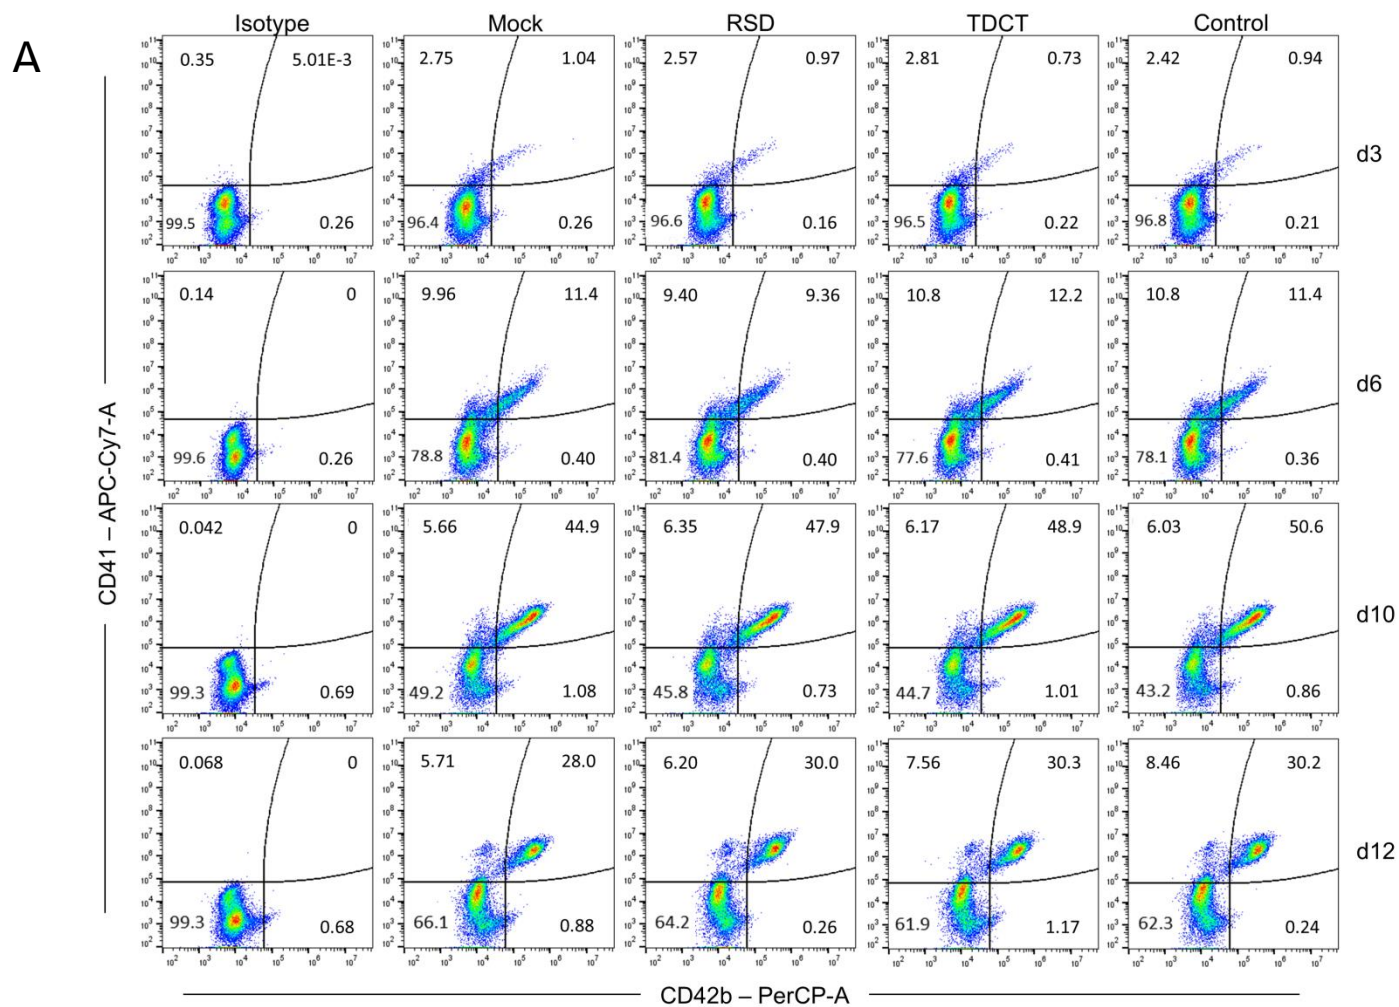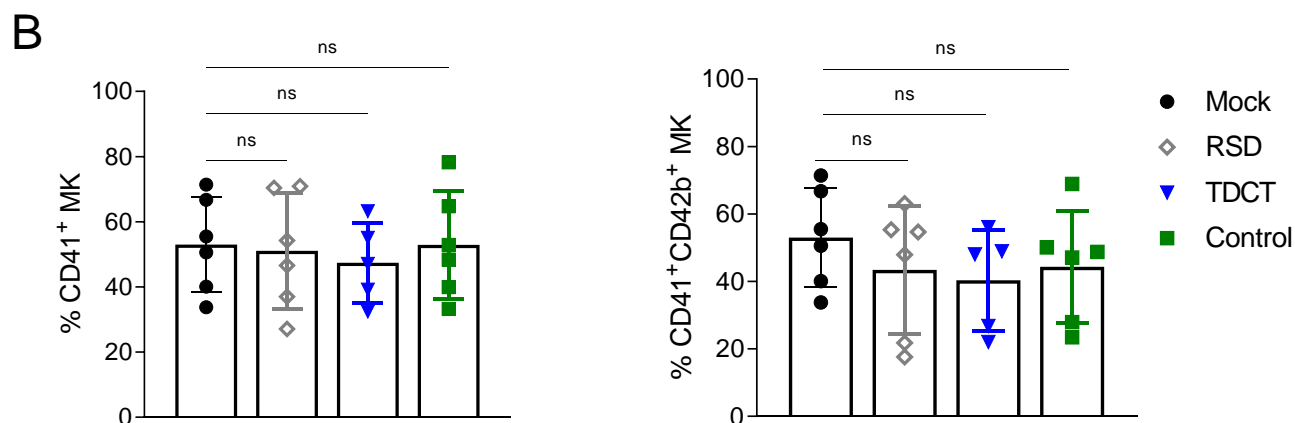

C

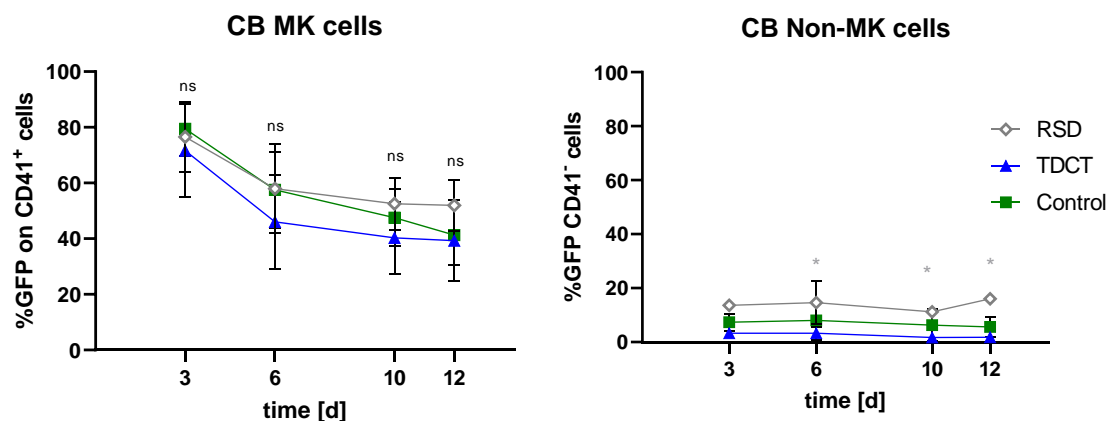

D

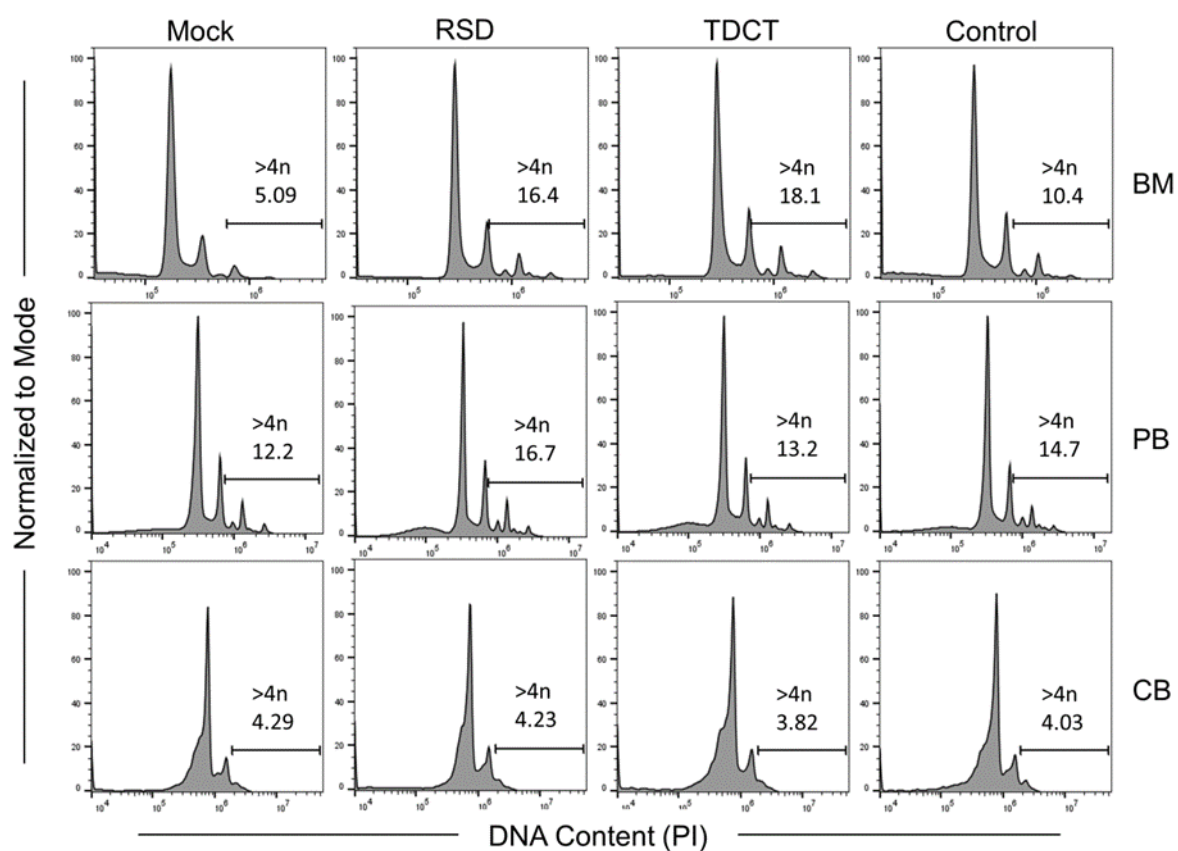

E

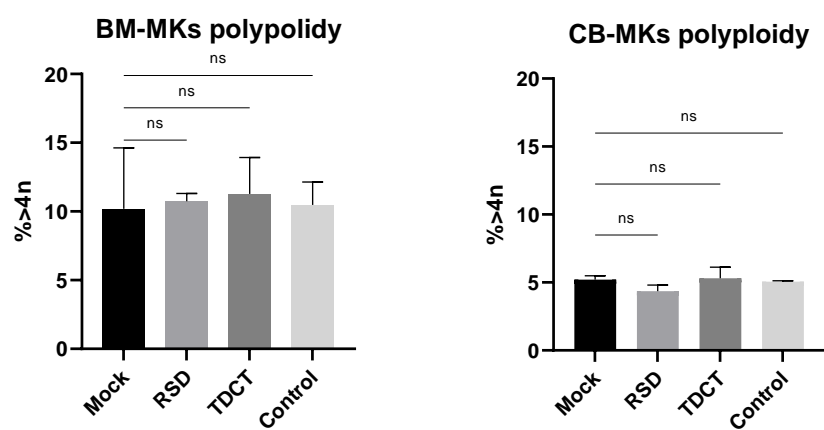

**Supplementary Figure S3: Characterization of *in vitro* differentiated human MK.**

Human CD34<sup>+</sup> hematopoietic stem and progenitor cells (HSPCs) were isolated from different cell sources, transduced with alpha granule targeting vectors (RSD, TDCT) or the non-targeting control, followed by differentiation towards MK using human cytokines (THPO, SCF and IL-6) for 12 – 14 days. **(A)** Representative dot plots showing CD41<sup>+</sup>/CD42b<sup>+</sup> surface marker expression of cord blood (CB)-derived megakaryocytes at different time-points for transduced cells and non-transduced mock cells. **(B)** Summary of percentages CD41<sup>+</sup> and CD41<sup>+</sup>/CD42b<sup>+</sup> MK harvested at the latest differentiation time-point (n=5-6 individual cultures). **(C)** Percentage of GFP expressing cells in megakaryocytes (CD41<sup>+</sup>) and non-megakaryocytes/non-differentiated cells (CD41<sup>-</sup>) differentiated from CB. **(D)** Representative flow cytometry histograms showing DNA content of mature MK differentiated from bone marrow (BM), apheresis (PB) or CB HSPCs and stained with propidium iodide (PI) staining solution. **(E)** Quantification of polyploidy (>4n) of MK differentiated from bone marrow (n = 3, two independent transductions) and cord blood (n = 4 – 5, two to three independent transductions). Data represent mean ± SD. Multiple comparisons to the Mock sample (B and E) were performed by One-way ANOVA with Dunett's comparison test ns = not significant. Multiple comparison between RSD, TDCT and control (C) were performed by Two-way ANOVA with Sidak's comparison test ns = not significant, \*p≤0.05.

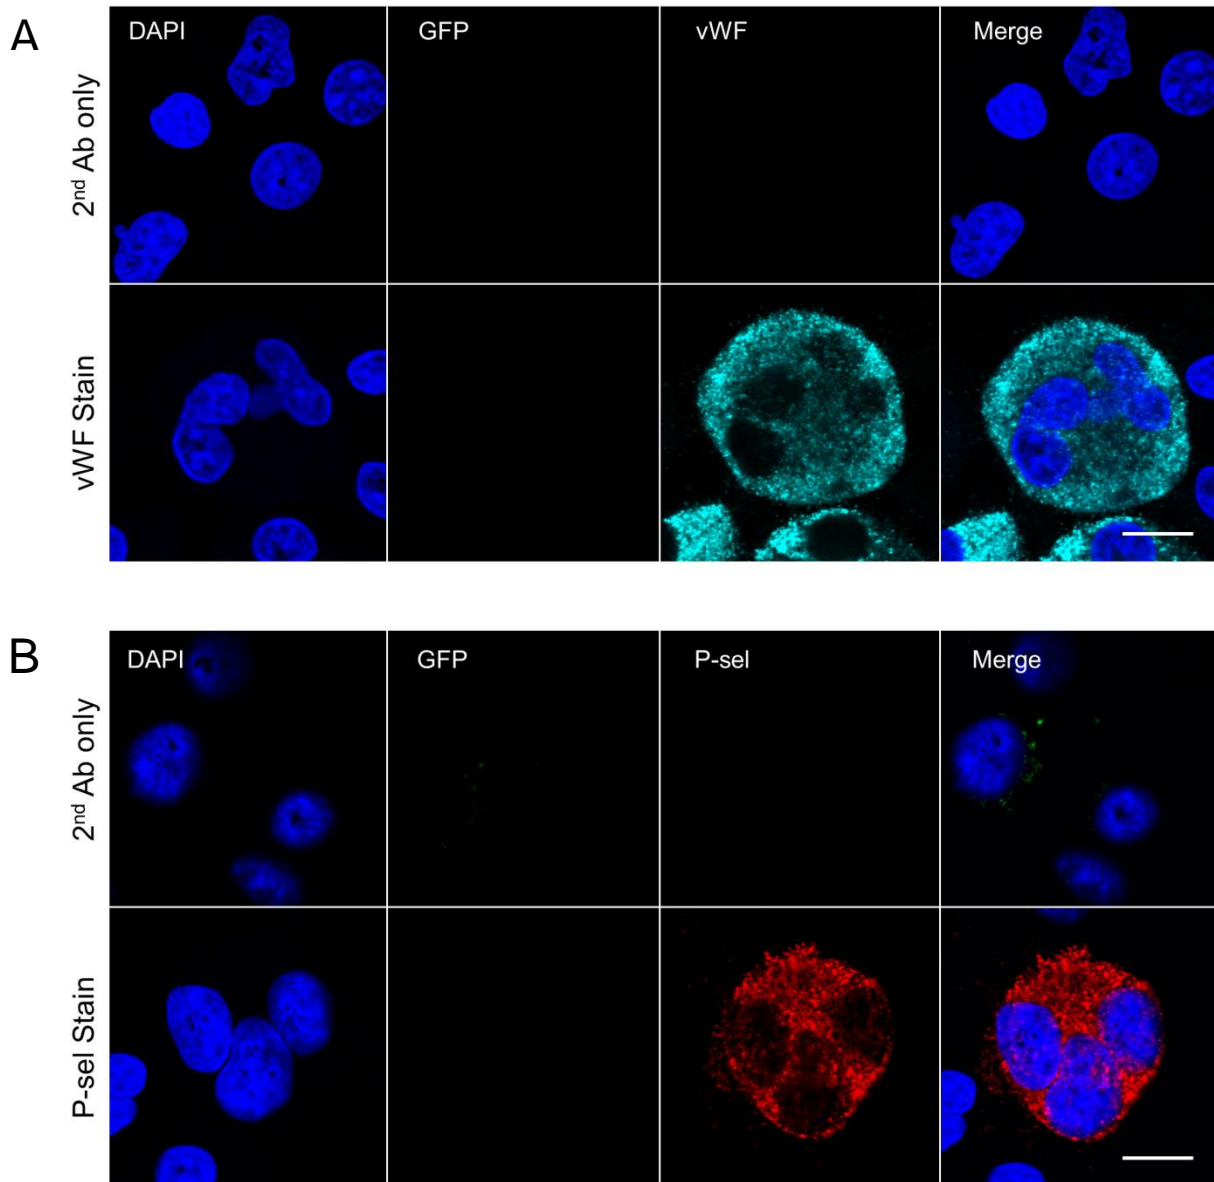

### Supplementary Figure S4: Human MK immunofluorescence controls

Non-transduced human CD34<sup>+</sup> cord blood HSPCs were differentiated towards MKs by stimulation with human THPO (50 ng/ml), SCF (25 ng/ml) and IL-6 (7.5 ng/ml). Mature cells harvested at day 12 were immuno-stained for alpha granule proteins using anti-von Willebrand factor (vWF, turquoise) and P-selectin (P-sel, red) antibodies. **(A)** vWF secondary antibody control - goat anti-rabbit IgG Alexa Fluor 647 (1:2000) (top panel) and vWF stain – anti-vWF, rabbit polyclonal (1:100) (bottom panel). **(B)** P-sel secondary antibody control – goat anti-mouse IgG Cy3 (1:2000, top panel) and P-sel stain – anti-human/mouse PE-conjugated CD62P (1:100, bottom panel). Nuclear counterstain was done with 4,6-diamidino-2-phenylindole (DAPI, blue, 1:5000). Background autofluorescence in the GFP channel was subtracted based on the secondary antibody controls. Images were acquired with 63X oil immersion objective using a Leica DMI8 Inverted-3 confocal microscope, scale bar = 10µm.

A

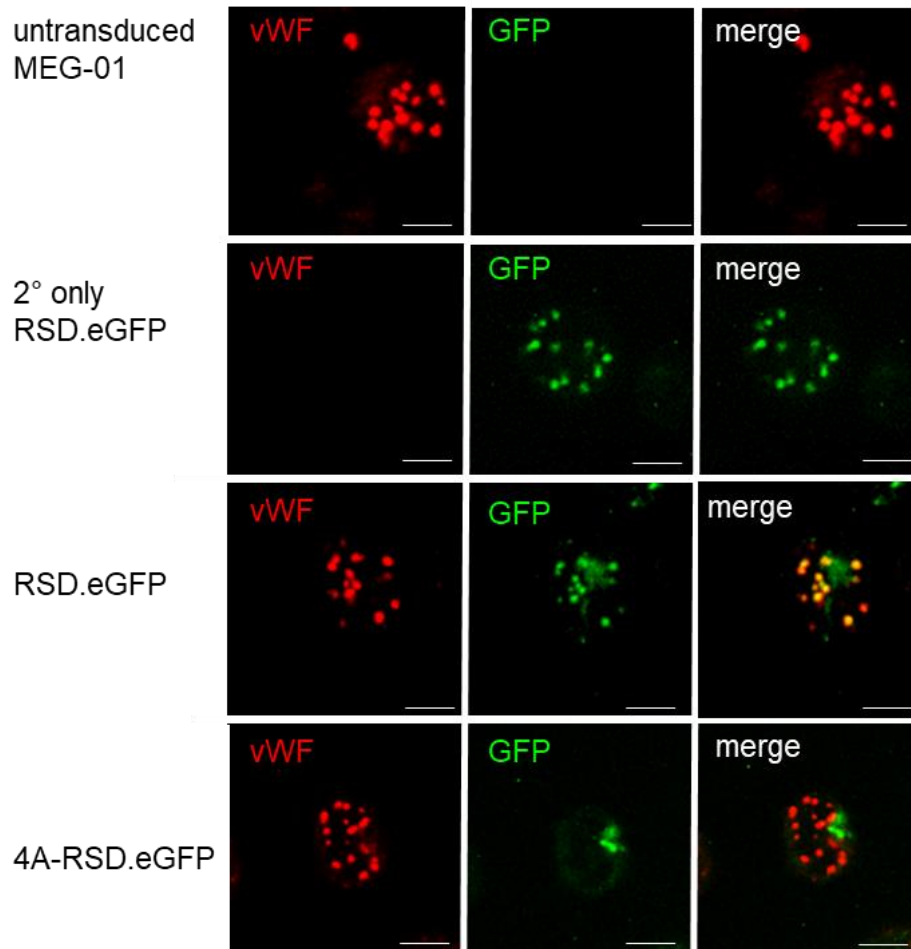

B

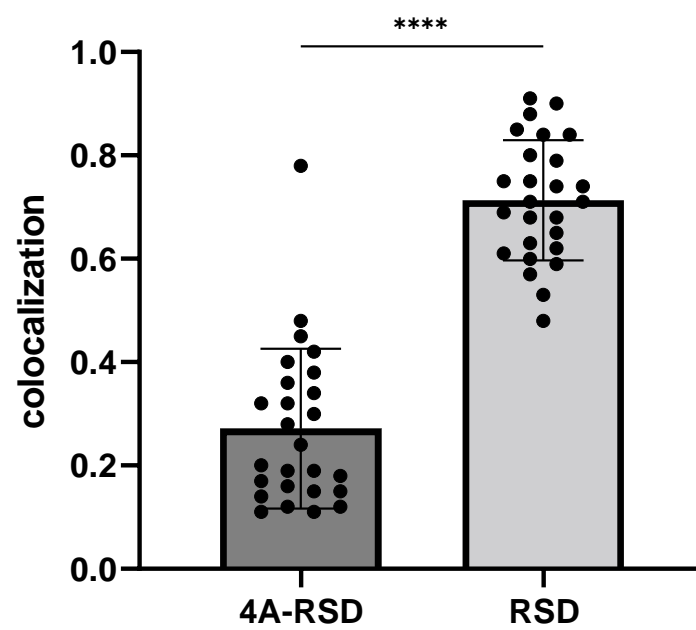

**Supplementary Figure S5: Colocalization of GFP expressed from the RSD and 4A-RSD vectors with  $\alpha$ G marker vWF in MEG-01 cells**

**(A)** MEG-01 cells were transduced with RSD.eGFP (RSD) or 4A-RSD.eGFP (4A-RSD, 4 amino acids in the main RANTES sorting domain (TRKN) substituted by alanine (AAAA)) vectors with the MOI of 1 and confocal immunofluorescence images were taken. MEG-01 cells were stained with primary rabbit antibody against the  $\alpha$ G protein vWF (1:100) visualized with secondary goat anti-rabbit antibody Alexa Flour 647 (1:1000, red). RSD transduced MEG-01 cells were used for the secondary antibody only control. The merged images of RSD show that GFP (green) colocalized with vWF (red). GFP expressed from the RSD vector showed a dotted appearance, while GFP expressed from the 4A-RSD vector was present at isolated areas in the transduced MEG-01 cell not colocalizing with vWF. Confocal images of stained MEG-01 cells were acquired in a 96-well plate with the Operetta high imaging system and a 40X objective (scale bar = 10  $\mu$ m). **(B)** Quantification of colocalization of GFP expressed from RSD vector (n = 26 individual cells, two transductions) and 4A-RSD vector (n = 26, individual cells, two transductions) with vWF. Data represents mean  $\pm$  SD. Statistical analysis were performed by Mann Whitney Test, \*\*\*\*p<0.0001.

A

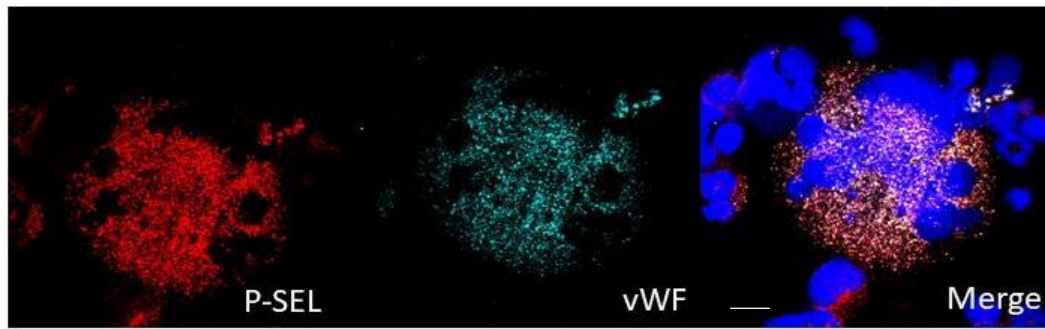

B

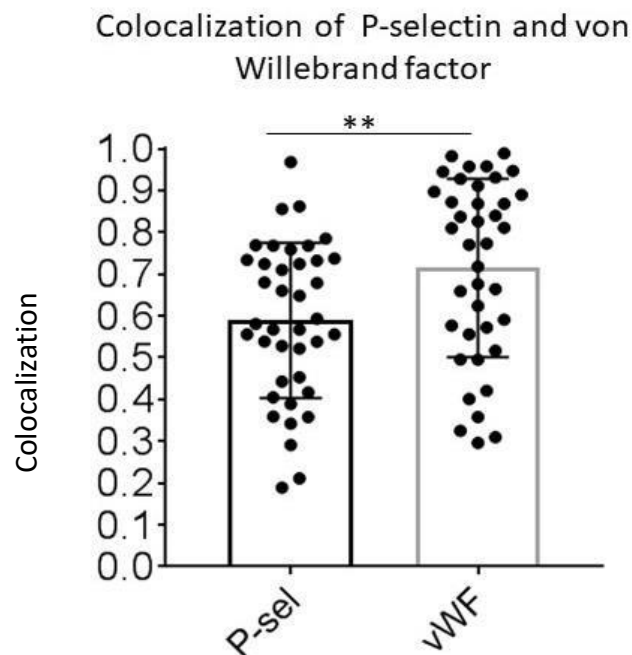

### Supplementary Figure S6: Alpha granule protein localization in murine MK.

Lineage marker negative cells were isolated from whole bone marrow of wild type C57BL/6J mice, and differentiated towards megakaryocytes by the stimulation of THPO (50 ng/ml). Mature non-transduced cells were harvested and immuno-stained for alpha granule proteins using anti-P-selectin and anti-vWF antibodies. **(A)** Representative confocal images of MK showing P-sel (red) and vWF (turquoise). Merge image shows overlapping P-sel and vWF signals (white) and nuclear stain DAPI (blue). Images were acquired with 100x oil immersion objective using the Zeiss LSM510 Axiovert500M confocal microscope, scale bar = 10  $\mu$ m. **(B)** Summary of colocalization of P-sel and vWF, where each dot represents one cell on the bar graph (n=37-39, independent cells). Statistical analysis was performed by Mann Whitney Test, \*\*p=0.0056. Data represents mean  $\pm$  SD.

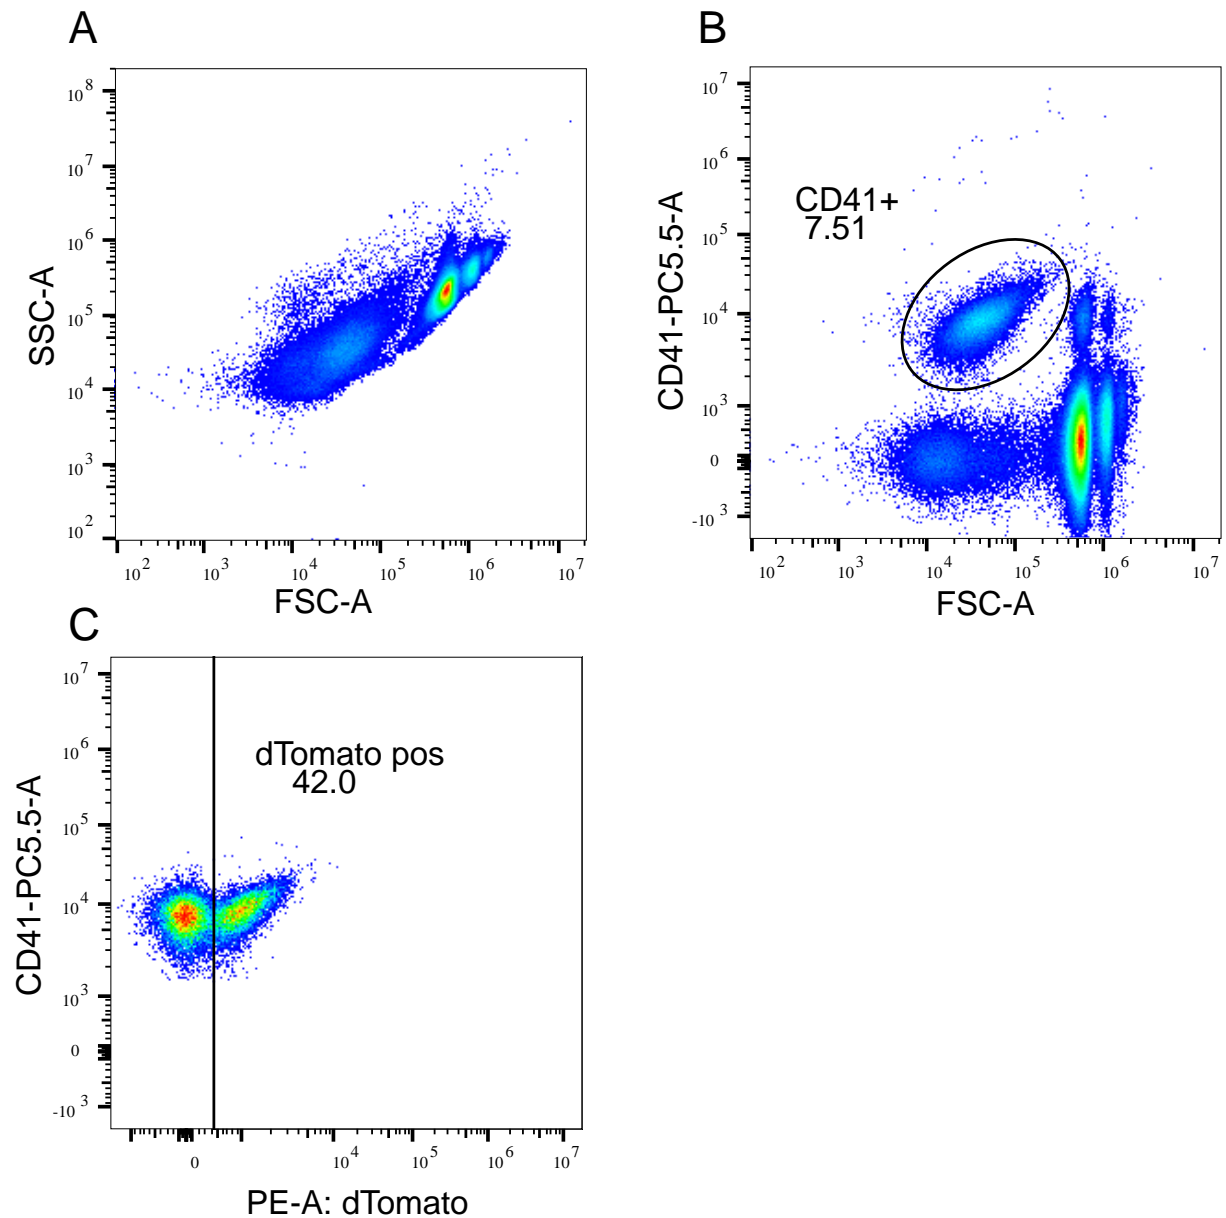

### Supplementary Figure S7: Gating strategy of murine blood platelets

Whole blood from mice was analyzed by flow cytometry. **(A)** Platelets were identified by size and **(B)** by CD41 cell surface staining. **(C)** In the CD41<sup>+</sup> platelet population, donor platelets were identified by dTomato expression.

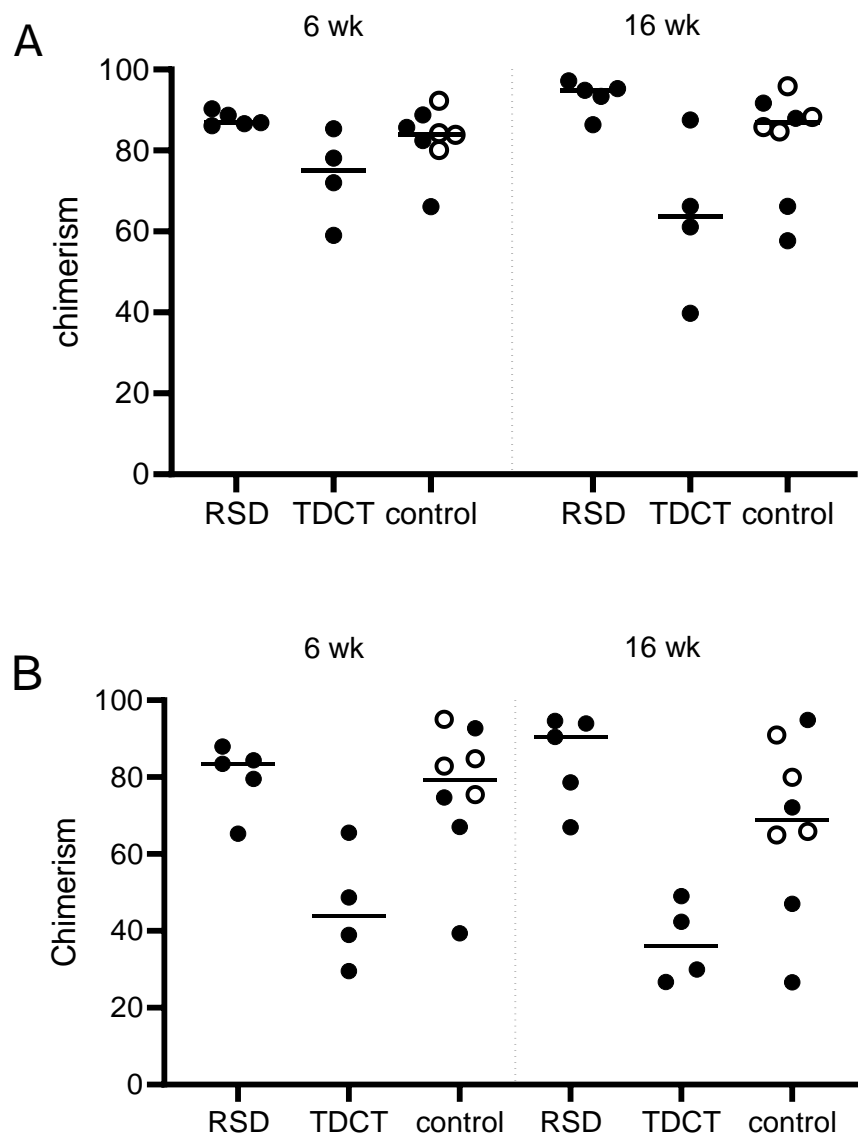

### Supplementary Figure S8: Chimerism after bone marrow transplantation.

Detection of chimerism of mTmG mice donor cells on **(A)** peripheral blood leukocytes and **(B)** platelets, 6 weeks (left) and 16 weeks (right) after BMT. Line drawn at mean, n=4-5 mice per treatment group. (Open circles: high VCN mice, closed circles: low VCN mice of the control group).

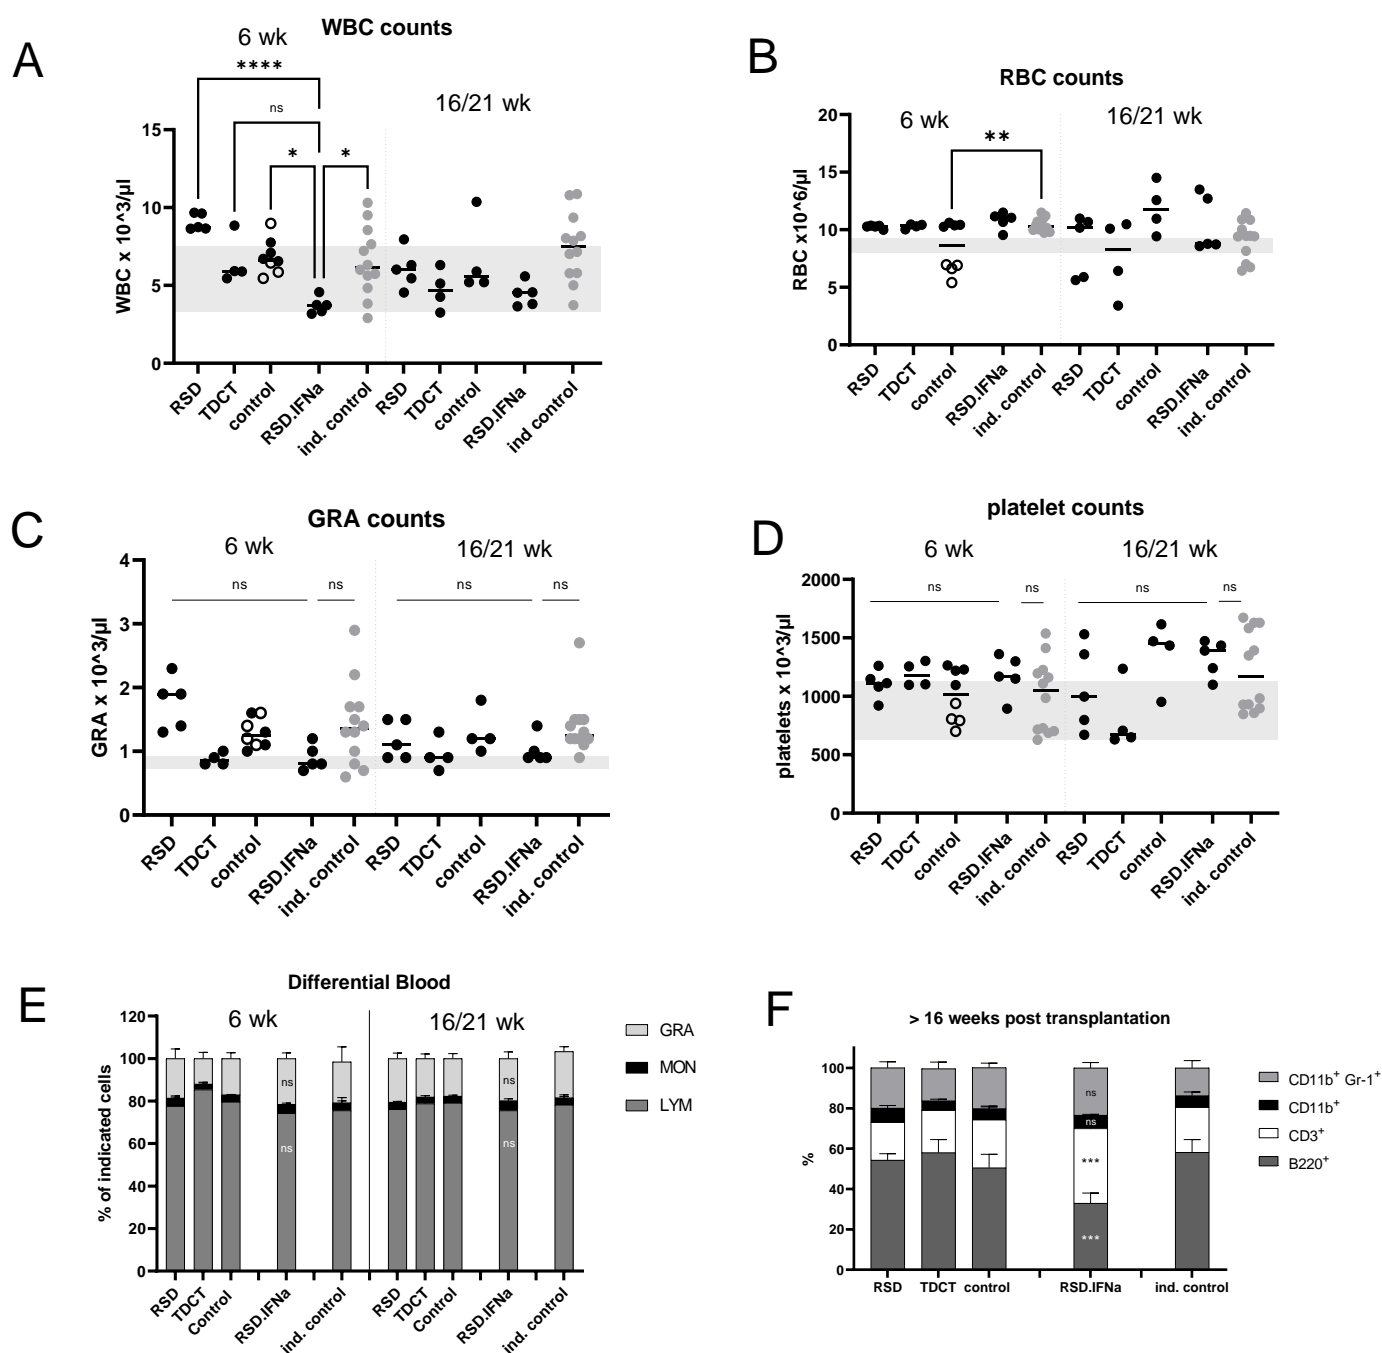

### Supplementary Figure S9: Peripheral blood cell counts

Six weeks and sixteen or twenty-one weeks after transplantation of lentiviral transduced BM cells into C57Bl/6J mice, peripheral blood was taken from the retro-orbital venous plexus and blood cell counts determined. **(A)** White blood cell (WBC) counts, **(B)** red blood cell (RBC) counts, **(C)** granulocyte (GRA) counts, **(D)** platelet counts, **(E)** differential blood cell contribution in the peripheral blood determined by automated blood analyzer, **(F)** contribution of CD11b<sup>+</sup>Gr1<sup>+</sup> granulocytes, CD11b<sup>+</sup> myeloid cells, CD3<sup>+</sup> T-cells and B220<sup>+</sup> B-cells to the peripheral blood determined by flow cytometry. Each dot represents one mouse from the experimental groups. (Open circles: high VCN mice, closed circles: low VCN mice of the control group). Blood from the RSD.IFNα mice was taken 6 and 21 weeks after transplantation. The shaded area represents the physiological range in C57Bl/6J age matched mice published by the Jackson Laboratories. The independent (ind.) control (grey icons) is comprised of

unpublished data from mice transplanted with lentiviral vectors expressing GFP from three independent transplantations and are shown here as additional control. Multiple comparison between the different vector constructs (A - F) were performed by Two-way ANOVA with Sidak's comparison test ns = not significant, \* $p \leq 0.05$ , \*\* $p < 0.01$ , \*\*\* $p < 0.001$  and \*\*\*\* $p < 0.0001$ .

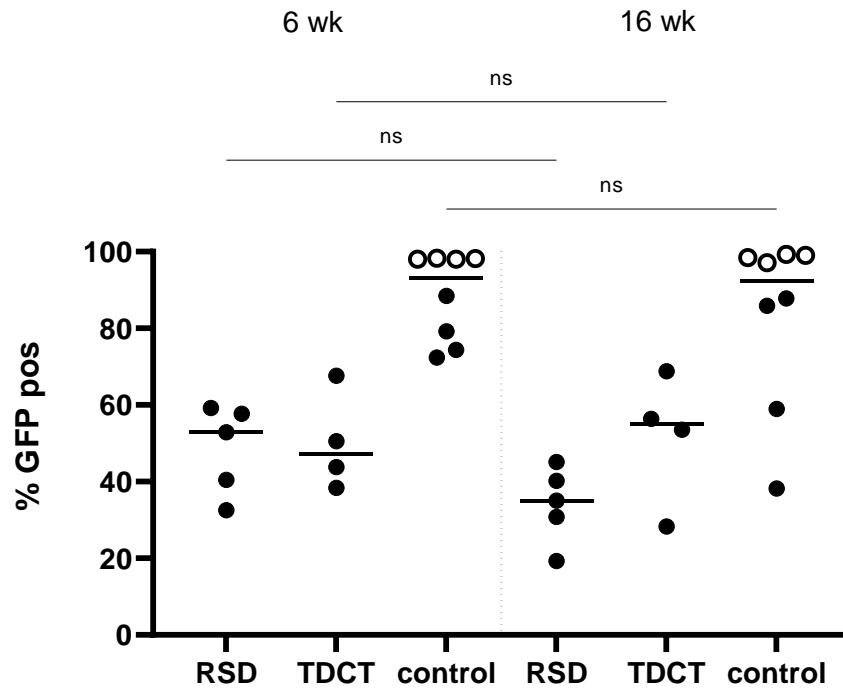

#### Supplementary Figure S10: GFP expression on donor platelets

The percentage of GFP was measured by flow cytometry in platelets in the peripheral blood 6 and 16 weeks after transplantation. The GFP percentage presented was pre-gated on donor platelets, based on the expression of dTomato (see Figure S4). (Open circles: high VCN mice, closed circles: low VCN mice of the control group). Multiple comparison between 6 and 16 weeks were performed by One-way ANOVA with Dunett's comparison ns = non-significant.

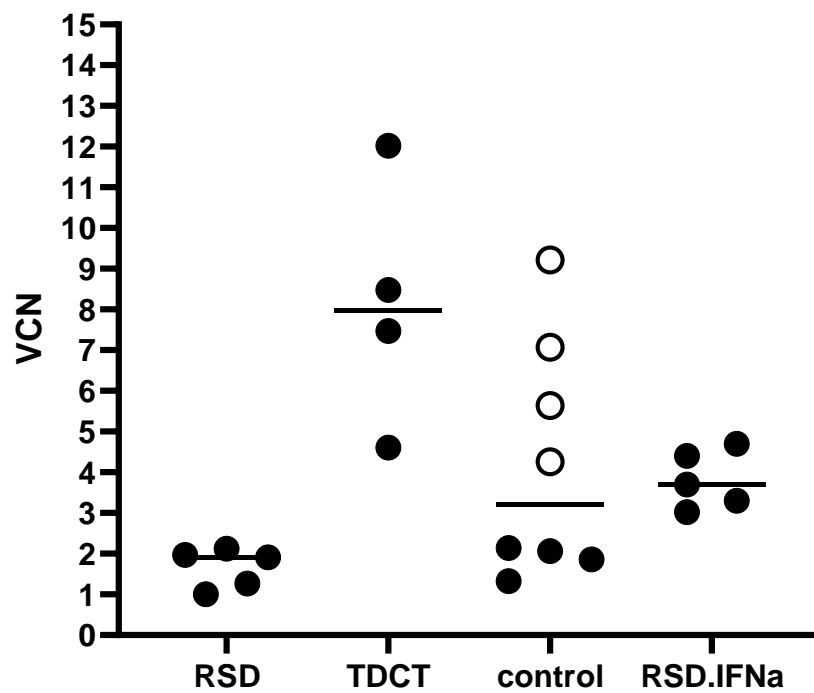

**Supplementary Figure S11: Mean vector copy (VCN) number in transplanted mice**

The vector copy number was determined by quantitative PCR on genomic DNA isolated from peripheral blood leukocytes of transplanted mice.

(Open circles: high VCN mice, closed circles: low VCN mice of the control group)

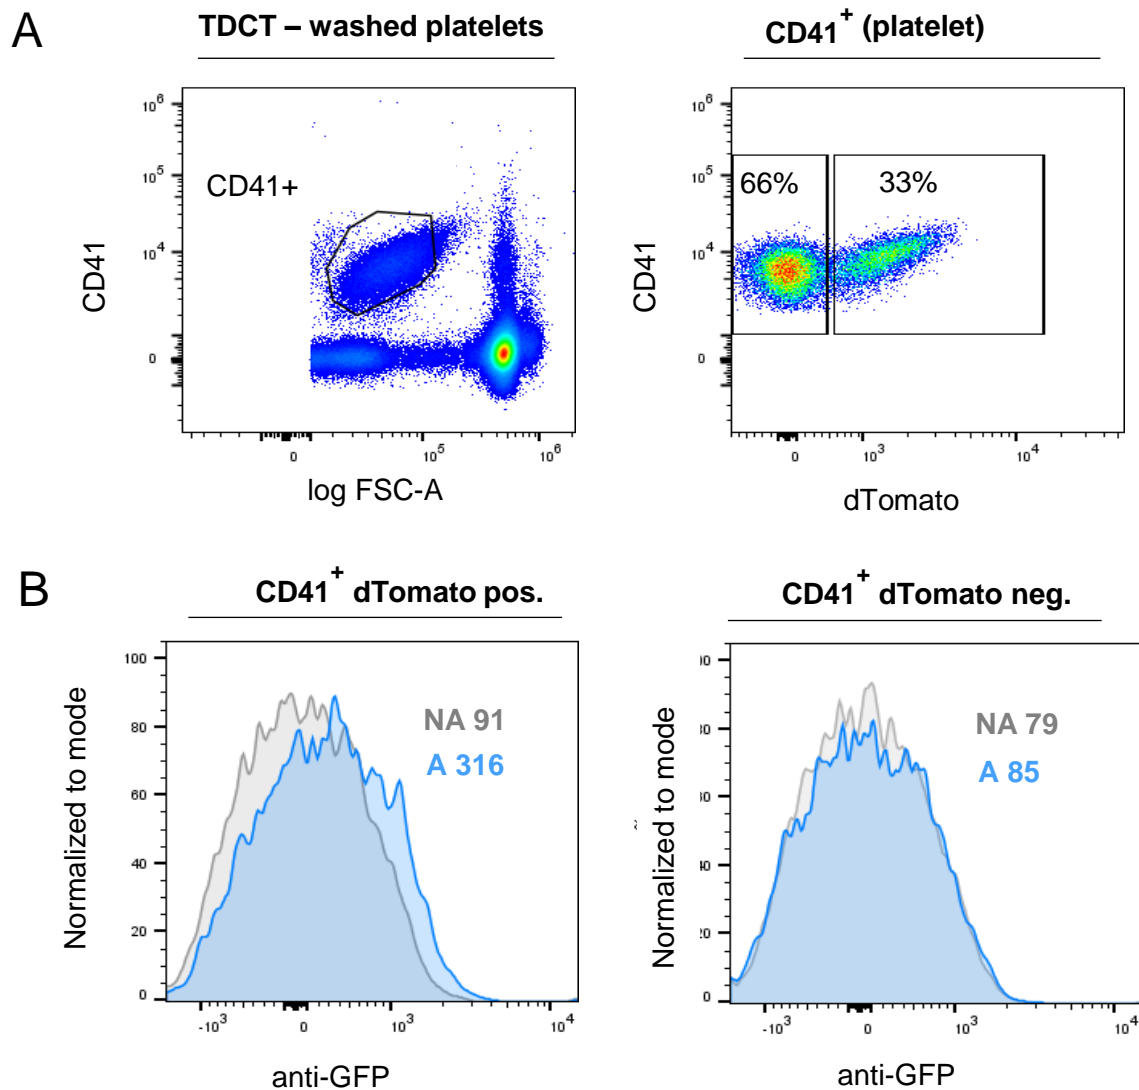

**Supplemental Figure S12: GFP presentation on the surface after activation of platelets from mice transplanted with BM cells transduced with the TDCT vector (A)** Flow cytometric analysis of washed platelets (CD41<sup>+</sup>) from mice transplanted mTmG lineage marker neg BM donor cells (dTomato<sup>+</sup>) transduced with the TDCT vector. **(B)** Representative flow cytometric histograms of non-activated (NA) and activated (A) platelets from donor derived (dTomato pos.) or recipient (dTomato neg.) cells. Platelets were activated with 0.1 U thrombin for 12 min and stained with anti-GFP antibodies (clone: 1A12-6-18, BD Bioscience).

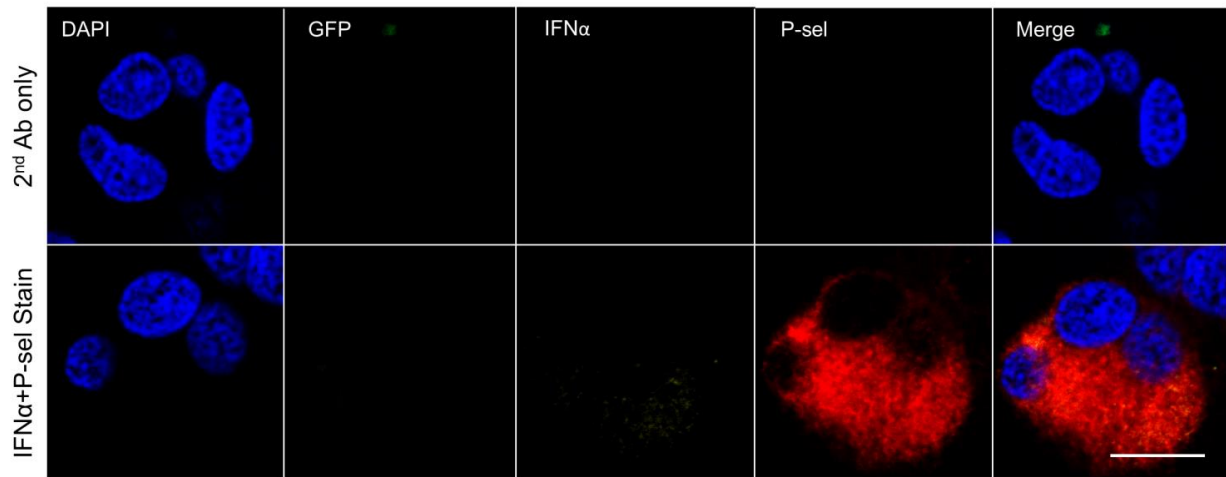

**Supplementary Figure S13: Human MK immunofluorescence controls for IFN $\alpha$  gene transfer vectors.**

Non-transduced human CD34<sup>+</sup> cord blood HSPCs were differentiated towards megakaryocytes by stimulation with THPO (50ng/ml), SCF (25ng/ml) and IL-6 (7.5ng/ml). Mature cells harvested at day 12 were immuno-stained for P-selectin (P-sel, red) and IFN $\alpha$  (yellow). Top panel: IFN $\alpha$  secondary antibody control - goat anti-rabbit IgG Alexa Fluor 647 (1:2000) and P-sel secondary antibody control – anti goat anti-mouse IgG Cy3 (1:2000). Bottom panel: IFN $\alpha$  stain with human IFN $\alpha$  (1:50) plus P-sel stain with anti-human/mouse PE-conjugated CD62P (1:100). Nuclear counterstain was done with DAPI (blue) (1:5000). Background autofluorescence in the GFP channel was subtracted based on the secondary antibody controls. Images were acquired with 63x oil immersion objective using a Leica DMI8 Inverted-3 confocal microscope, scale bar = 10 $\mu$ m.

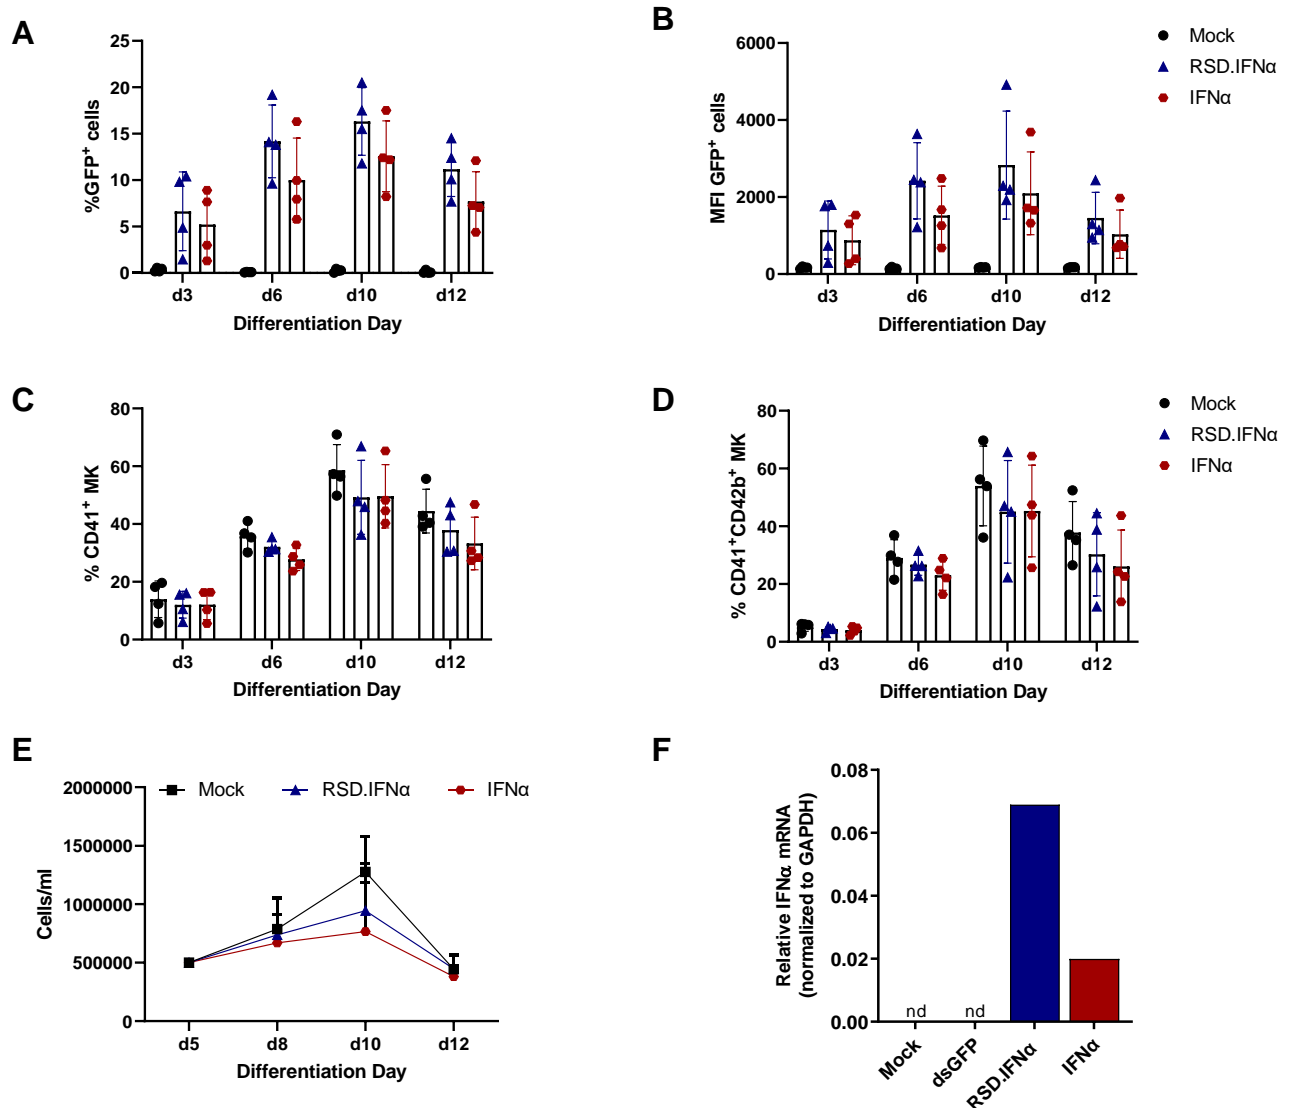

**Supplementary Figure S14: Differentiation characterization of cord blood derived MK expressing IFNα gene transfer vectors**

CD34<sup>+</sup> HSPCs were isolated from cord blood and transduced with RSD.IFNα and IFNα vector supernatants at MOI 40. Mock and vector-transduced cells were differentiated towards MK for 12 days. Flow cytometry determination of **(A)** Percentage of GFP<sup>+</sup> cells, **(B)** MFI of GFP<sup>+</sup> cells, **(C)** percentage of CD41<sup>+</sup> and **(D)** CD41<sup>+</sup>/CD42b<sup>+</sup> cells. **(E)** Cell proliferation from d5 – d12. A-E: n = 4 from 3 donors, data represent mean ± SD. **(F)** Relative IFNα mRNA expression of Mock, dsGFP, RSD.IFNα and IFNα MK harvested on d12, n=1 from one donor.

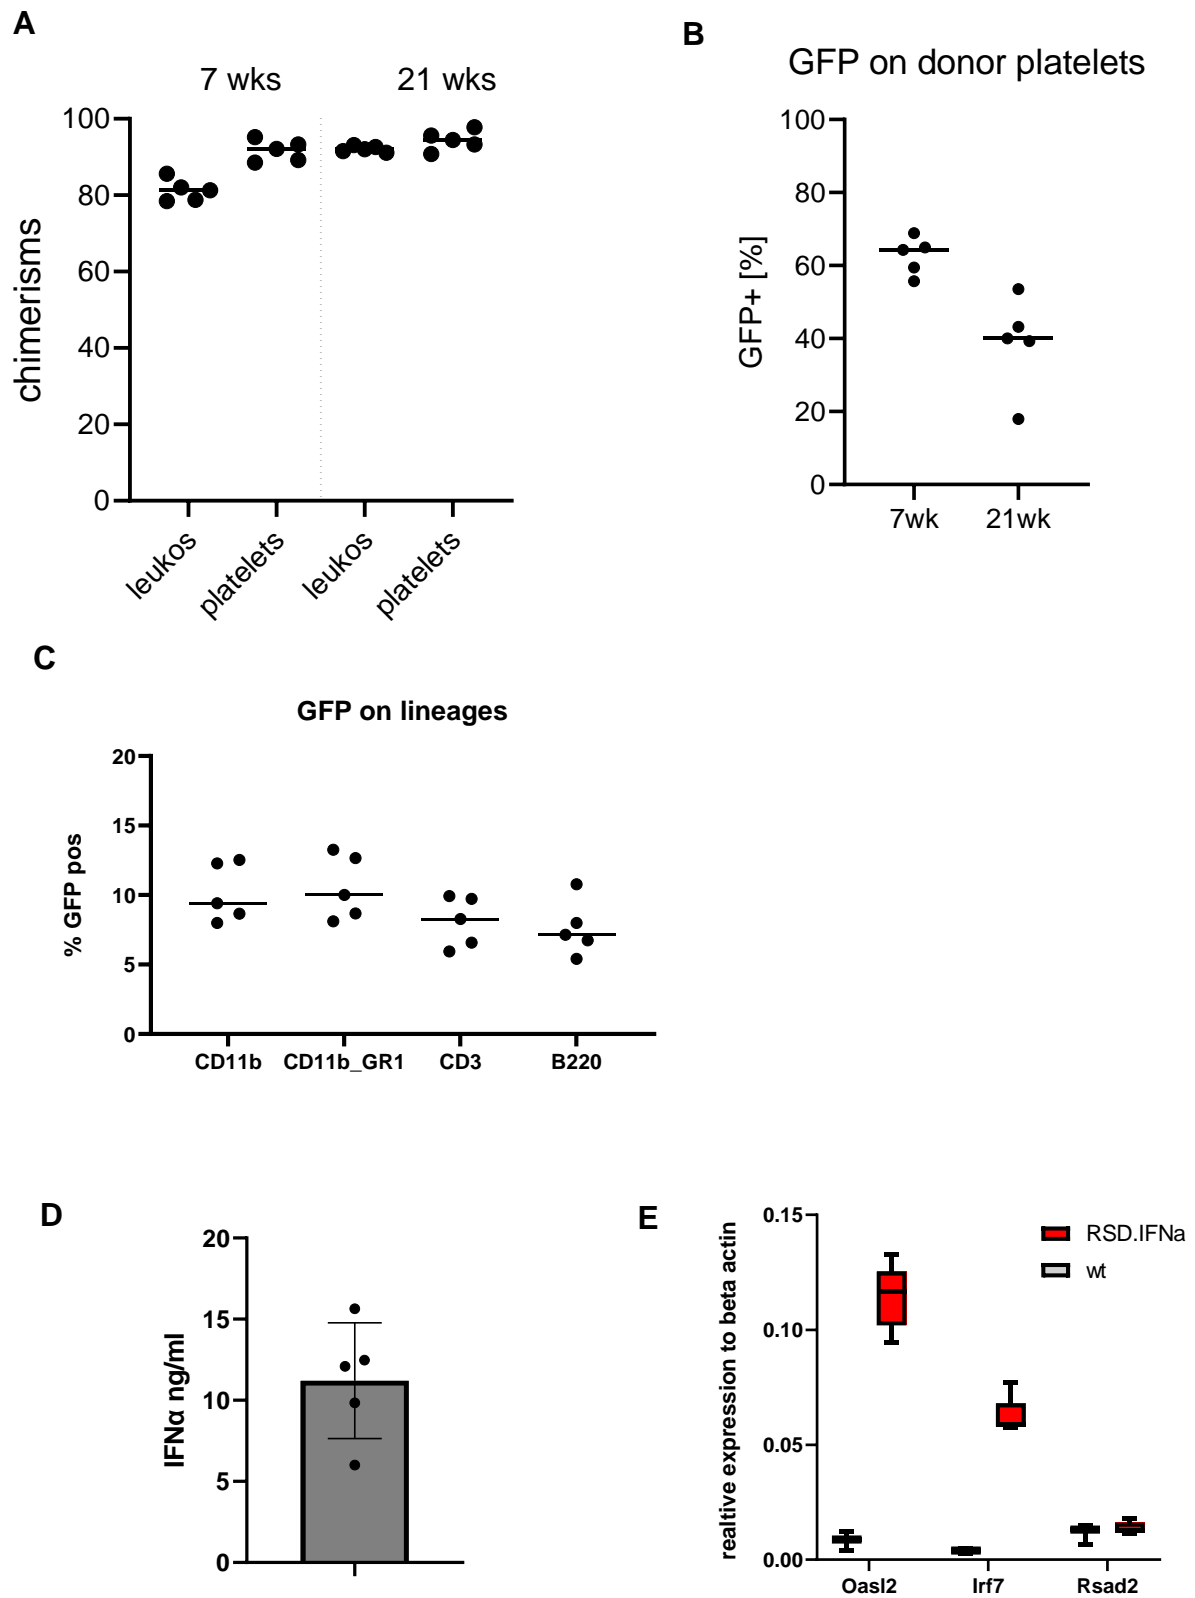

**Supplementary Figure S15: Engraftment of RSD.IFN $\alpha$  transduced BM cells**

**(A)** Chimerism of C57Bl/6 mice transplanted with RSD.IFN $\alpha$ -transduced Lin<sup>-</sup> BM cells of mTmG donor mice (n = 5). **(B)** GFP expression on donor platelets in transplanted mice. **(C)** GFP expression in myeloid cells (CD11b), granulocytes (CD11b\_Gr1), T-cells (CD3) and B-cells (B220) in the blood of mice transplanted with RSD.IFN $\alpha$ -transduced Lin<sup>-</sup> BM cells. **(D)** IFN $\alpha$  concentration in the serum of RSD.IFN $\alpha$  transplanted mice (n=5) **(E)** Relative mRNA expression of three IFN $\alpha$  target genes in the bone marrow of mice of the RSD.IFN $\alpha$  group (n = 5 in three technical replicates) compared to wt mice (n = 3 in three technical replicates).

**A**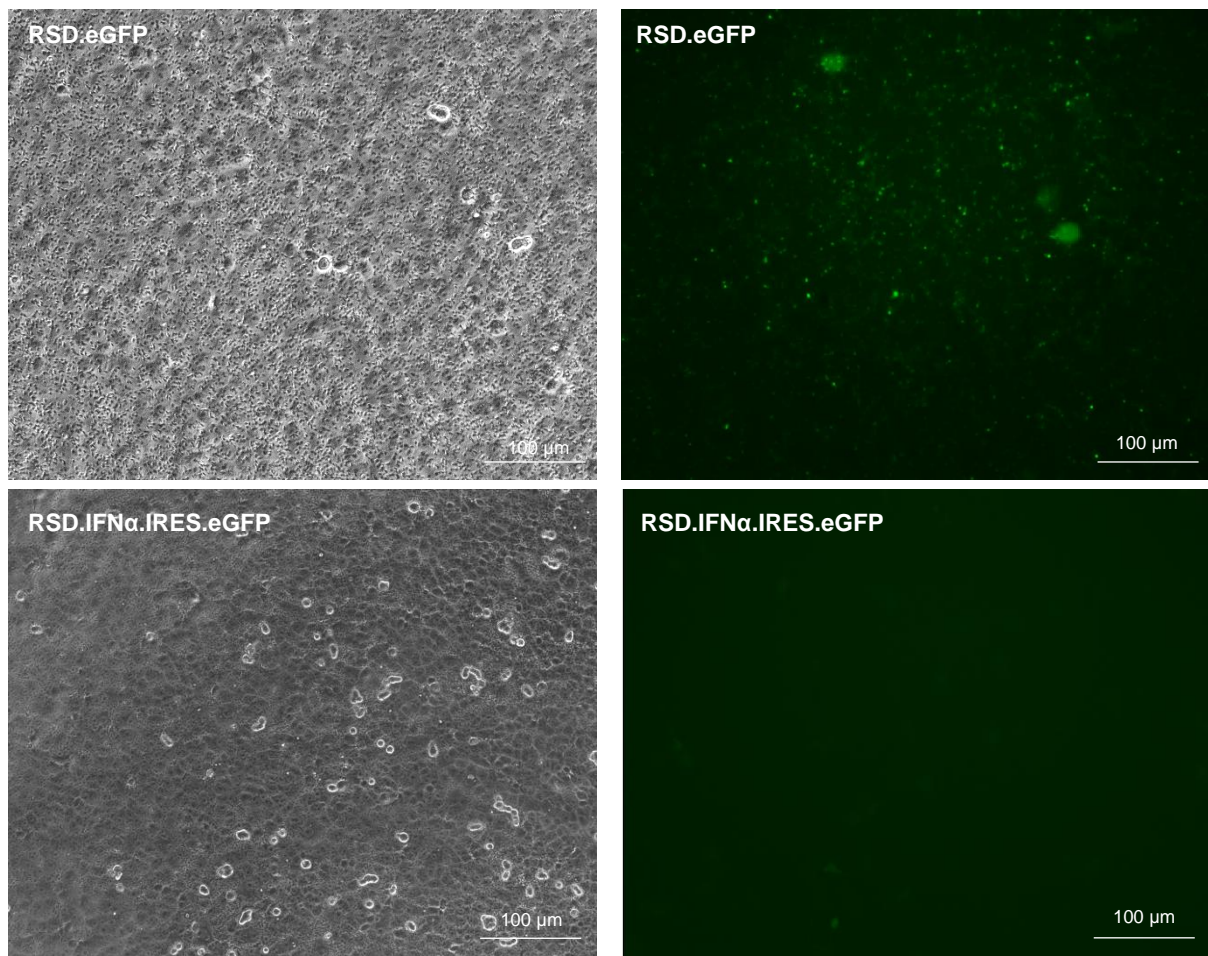**B**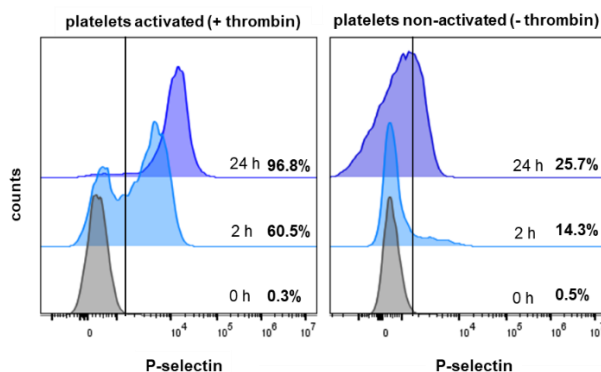**C**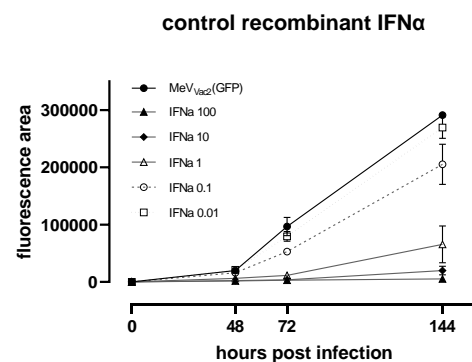

### Supplementary Figure S16: Platelets in co-culture with Vero-E6 cells.

**(A)** Confluent Vero-E6 cells with platelets in the medium (dark grey, left images); platelets were isolated from mice transplanted with BMC transduced with the RSD.eGFP (top) and RSD.IFNα.IRES.eGFP (bottom) vector. GFP-fluorescent platelets (top right image) isolated from mice that express from the RSD.eGFP vector. Magnification 200x, scale bar = 100 μm. GFP-fluoresces of platelets isolated from mice transplanted with RSD.IFNα.IRES.eGFP could not be detected via the fluorescence microscope. **(B)** P-selectin surface expression of thrombin activated platelets (activation was done in the well) and non-activated platelets at 0, 2 and 24 hours co-cultivation with Vero-E6 cells. **(C)** Time course of virus replication (MOI

0.01) treated with decreasing doses of IFN $\alpha$  (100-0.01 U) measured by the fluorescent area at 48 h, 72 h and 144 h after infection (mean  $\pm$  SD, experiments was done twice, three images per well were analyzed at magnification 40x).

**A**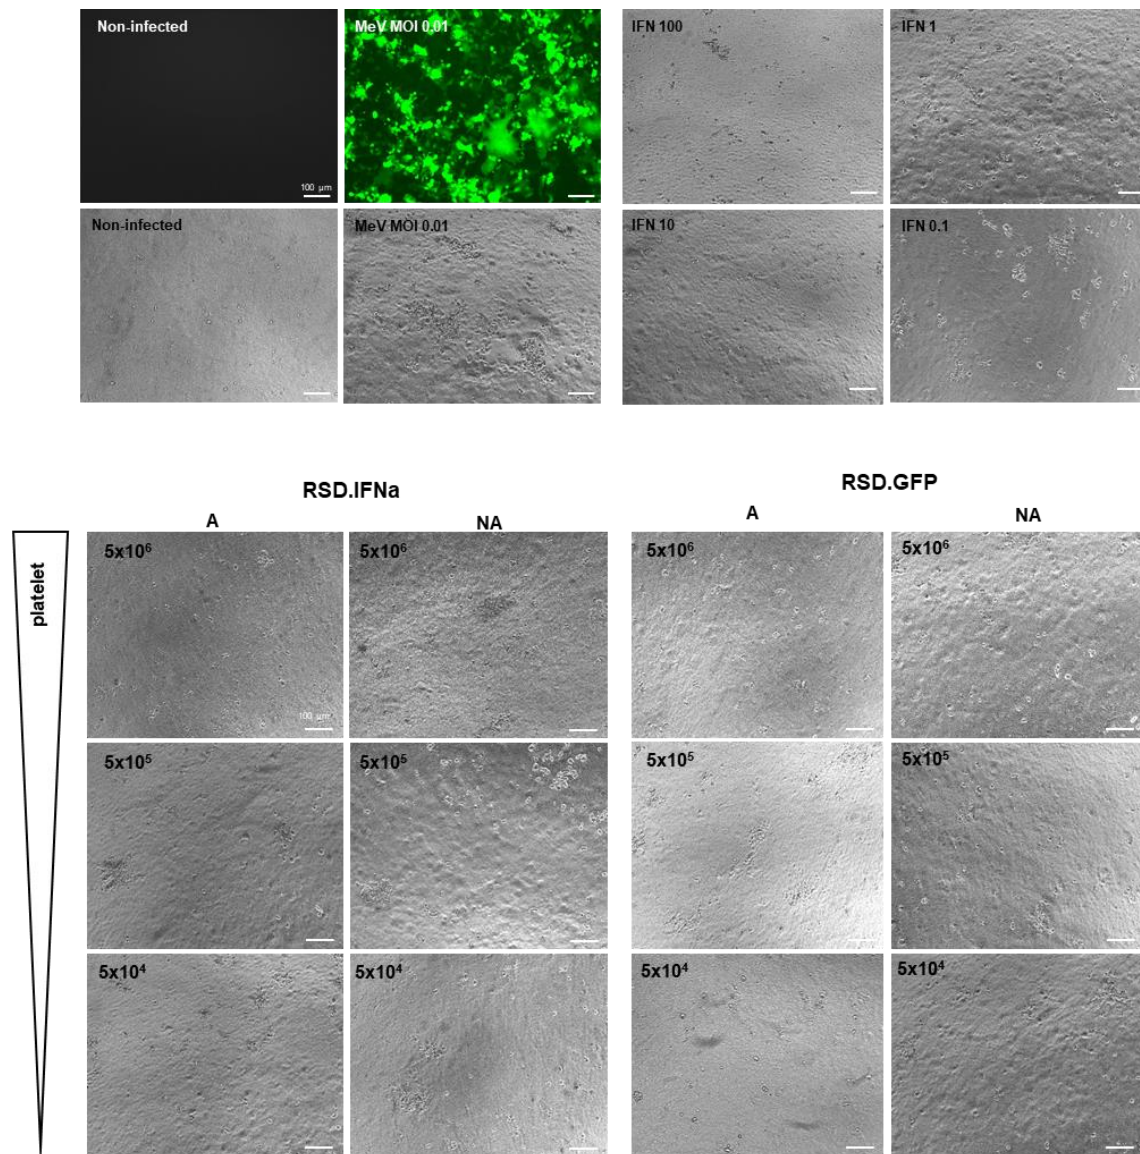

**Supplementary Figure S17: Measles virus replication assay controls.**

**(A)** Upper left: No GFP background fluorescence signal from Vero-E6 cells. Rest: Measles virus replication starting with an MOI of 0.01 did not alter the cell viability of the Vero-E6 cells. Vero-E6 cells were at all time points confluent during the measles virus replication assay and were not altered by the IFN $\alpha$  treatment or co-cultivation with activated or non-activated RSD.IFNa or RSD.eGFP platelets. Magnification 200x, scale bar = 100  $\mu$ m.

| Protein                               | Species                                             | Sequence                            | Reference        |
|---------------------------------------|-----------------------------------------------------|-------------------------------------|------------------|
| RANTES<br>sorting domain              | <i>Mus musculus</i>                                 | VVFVTRNRQ                           | (uniprot p30882) |
|                                       | <i>Homo sapiens</i>                                 | VVFVTRKNRQ                          | (uniprot p13501) |
|                                       | Sequence identity: 90%<br>Sequence similarity: 100% |                                     |                  |
| P-selectin<br>transmembrane<br>domain | <i>Mus musculus</i>                                 | RKRIRKKDDGKCPLNPHSHLGTYGVFTNAAYDPTP | (uniprot p30882) |
|                                       | <i>Homo sapiens</i>                                 | RKRFRKKDDGKCPLNPHSHLGTYGVFTNAAFDPS  | (uniprot p13501) |
|                                       | Sequence identity: 89%<br>Sequence similarity: 97%  |                                     |                  |
| P-selectin<br>cytoplasmic tail        | <i>Mus musculus</i>                                 | LTYLGGA VASTTGLAVGGTLLALL           | (uniprot p30882) |
|                                       | <i>Homo sapiens</i>                                 | LTYFGGA VASTTGLIMGGTLLALL           | (uniprot p13501) |
|                                       | Sequence identity: 83%<br>Sequence similarity: 88%  |                                     |                  |

### Supplementary Figure S18: Alignment of the murine and human aa sequence of the sorting domains

Aa sequence alignment of the RANTES sorting domain, P-selectin transmembrane domain and cytoplasmic tail from mouse and human. Yellow labeled aa represent an aa exchange to an aa with similar properties and blue labeled aa an aa exchange to an aa with different properties.
